# Supplementary material
Source: Research Square preprint supplement (doi:10.21203/rs.3.rs-10135111/v1)
Supplement: Supplementary file 1 [file 7d1b92f15c67574bc6c8d5c9.docx]

**Supplementary Information**

**Active Reverse Bias Protection for Perovskite Solar Cells Under Variable Illumination via Integrated Bypass Diodes**

**Supplementary Methods**

**Materials**

Formamidinium iodide (FAI, 99.9%), methylammonium iodide (MAI, 99.9%), methylammonium Chloride (MACl, 99.9%) Cesium iodide (CsI, 99.9%), Lead iodide (PbI2, 99.999%), Phenethylammonium chloride (PEACl, 99.9%), [4-(3,6-dimethyl-9H-carbazole-9-yl)butyl] phosphonic acid(Me-4PAC, 99.9%) and 2,2',7,7'-tetra(N, N-di-tolyl)aMino-spiro-bifluor (Spiro-TTB, 99.5%) were purchased from Xi’an Polymer Light Technology Corp. MoO3 was purchased from Aladin. Tin (IV) oxide (SnO2) colloid solution (15 wt.%) was purchased from Alfa–Aesar. NiOX nanoparticles, Fullerene (C60, 99.9%), and 2,9-dimethyl-4,7- diphenyl-1,10-phenanthroline (BCP, 98%), were procured from Advanced Election Technology. Chlorobenzene (CB, anhydrous, 99.8%), N,N-dimethylformamide (DMF, anhydrous, 99.8%), dimethyl sulfoxide (DMSO, anhydrous, ≥99.9%), isopropyl alcohol (IPA, 99.8%) and ethyl alcohol (anhydrous, 99.5%) were purchased from Sigma-Aldrich. 4,5-Dichloro-2-methylimidazole were purchased from Shanghaiyuanye Bio-Technology Co., Ltd. All materials used directly after purchase without further processing.

**Device fabrication**

**For the 1.5 M Cs0.05FA0.85MA0.1PbI3 perovskite solution,** it was dissolved by mixing CsI (19.5 mg), FAI (219.26 mg), MAI (23.85 mg), PbI2 (753.76 mg, 9% excess) and MACl (12.15 mg, with a molar ratio of 12%) in 1 ml of a DMF:DMSO mixed solvent (v/v=4:1). Then stirred at room temperature for 2 hours.

**For device W/O IBD,** the ITO glass (24.5 mm×24.5 mm, 7-8 Ω sq⁻¹) was ultrasonically cleaned in deionized water with alkaline glass cleaner, deionized water, isopropanol, and ethanol for 20 minutes each. It was then dried with a nitrogen gun and treated with ultraviolet ozone for 15 minutes. The NiOX dispersion was sonicated in water for 10 minutes and filtered through a 0.22-μm PES membrane before use. 80 μl of this dispersion was spin-coated onto the ITO at 2000 rpm for 30 s and then annealed at 150 °C for 30 minutes. Immediately after that, it was transferred into a nitrogen-filled glove box. 100 μl of the Me-4PACz solution (0.5 mg/ml in ethanol) was spin-coated at 3000 rpm for 30 s and annealed at 100 °C. Then, 80 μl of 4,5-D-2-MI solution (0.5 mg/ml) was spin-coated at 4000 rpm for 30 s and annealed at 70 °C for 10 minutes. The perovskite solution as prepared was then spin-coated at 1000 rpm for 10 s and then at 4000 rpm for 40 s. 160 μl antisolvent (CB) was rapidly and steadily dropped at 5 s before the end of spin-coating and subsequently annealed at 100 °C for 30 minutes. PEACl (0.5 mg/ml) was dissolved in a mixed IPA:DMSO (99:1) and spin-coated at 5000 rpm for 30 s, annealed at 100 °C for 10 minutes. Then, 25 nm C60 and 6 nm BCP were successively deposited by evaporation under a vacuum of 10-5 Pa, and 120 nm Ag was evaporated under a vacuum below 10-5 Pa.

**For device with IBD,** before NiOx deposition a 3M 7413D tape was used to cover the main solar cell area. 100 μL of diluted SnO2 solution (3 wt.%) was spin-coated at 3000 rpm for 30 s and annealed at 150°C for 30 min. The tape was removed after cooling to room temperature, and the substrate was treated with UV-ozone for 5 min. Similarly, a new 3M 7413D tape was applied to cover the bypass diode zone. 80 μL of NiOx dispersion as prepared above was spin-coated at 2000 rpm for 30 s, annealed at 150°C for 30 min, removed the tape and treated with UV-ozone for 5 min after cooling. Then, Me-4PACz/4,5-D-2-MI/Perovskite/PEACl were deposited in the same sequential steps and process. 25 nm C60 and 6 nm BCP were desposited using a shadow mask (25 mm×25 mm) with a hollowed-out rectangle (20 mm×18 mm, as shown in Fig. 6) to define the main cell region. Similarly, 10 nm Spiro-TTB and 6 nm MoO3 were deposited using a complementary shadow mask (25 mm×25 mm) with a hollowed-out rectangle (20 mm×7 mm,as shown in Fig. 6) to define the bypass diode region. And 120 nm Ag was evaporated under a vacuum below 10-5 Pa.

**Characterization**

***J-V* measurement.** The *J-V* curves of PSCs were measured by Xenon lamp-based solar simulator and digital source meter (Keithley 2901A). The light intensity was calibrated to 1/0.8/0.6/0.4/0.2-sun (100/80/60/40/20 mW cm-2) light by using a silicon reference cell (Enlitech SRC-00620). Samples masked with an active area of 0.07 cm². Scans were performed in a N₂-filled glovebox with a voltage range of -0.1 V to 1.3 V (step size = 0.02 V) for forward and reverse scans. Dark reverse bias J-V measurements were conducted from 1.3 V to -8 V (step size = 0.02 V) after pre-biasing at 0 V for 10 min.

**Reverse bias stability measurements.** Short/long-term reverse bias stability of unencapusulated perovskite solar cells were measured by using digital source meter (PURI2400-8Q). Short-term reverse bias stability was evaluated by recording I-T curves with the source meter under steady-state conditions (25 °C, N₂ atmosphere) at reverse biases of -1 V to -5 V. Long-term reverse bias stability of unencapsulated devices were biased at -5 V or -0.12 A in a N2-filled glovebox (25 ℃) for 150 hours. Periodic *J-V* measurements were conducted to track PCE retention. Maximum Power Point Tracking (MPPT) tests were performed in an environmental chamber (25 ℃, N2 atmosphere) under 1-sun LED illumination (100 mW·cm-2) using a PURI solar simulator.

**Film characterization.** Scanning electron microscopy (SEM), energy-dispersive spectroscopy (EDS) images of perovskite films were obtained using Gemini SEM 300. Ag element distribution was highlighted to analyze electrode migration. X-ray photoelectron spectroscopy (XPS) measurements were performed using a ThermoVG Scientific ESCALAB 250 X-ray photoelectron spectrometer with a monochromatic Al (Kα) (1,486.6 eV) X-ray source. X-ray diffraction (XRD) is completed by Rigaku Smartlab diffraction meter equipped with Cu K-α radiation source (λ = 1.5405å). Top-view optical microscope images were obtained using a Leica DVM6A microscope to observe electrode corrosion and surface morphology changes. TOF-SIMS depth profiles were conducted using a 30 keV Bi3+ primary ion beam (0.49 pA, 100 × 100 μm2), and equipped with a 1 keV ion beam (120 nA, 300 × 300 μm2) for sputtering.

**Simulation**

**Numerical ionic-electronic device simulation.** A one-dimensional drift–diffusion model was implemented in COMSOL Multiphysics to capture electrical behavior of the perovskite solar cells. The electron and hole transport were governed by the standard semiconductor equations, including the Poisson equation and carrier continuity equations. Photogeneration within the perovskite absorber was treated using an effective uniform generation rate, derived from the experimentally relevant short-circuit current density and scaled by the incident light intensity, which defined as:


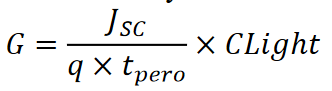


where *JSC* is the short-circuit current density under 1 sun illumination, q is the elementary charge, *tpero* is the perovskite thickness, and *CLight* is a scaling factor representing the illumination intensity (0-1 sun).

Ionic migration was incorporated by introducing an additional continuity equation within the coefficient-form PDE framework, accounting for field-driven drift and diffusion of mobile ionic species. The concentrations of mobile cations and anions were assumed to be 1017 cm-3.The anion diffusivity was fixed at 1013 cm2/s, whereas the cation diffusivity was defined as a light-intensity-dependent parameter:


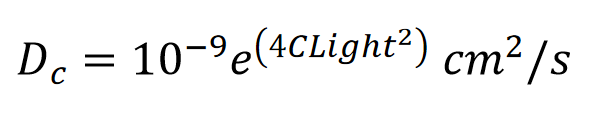


to capture the photo-assisted ion migration proposed by Henzel et al.1

To account for the absence of explicit transport layers and interfacial passivation in the simplified structure, surface recombination was introduced at the perovskite interfaces. The corresponding trap densities were adjusted to reproduce experimentally relevant open-circuit voltage, effectively capturing the impact of interfacial recombination losses.

Zener breakdown was implemented at the heterojunction between the perovskite absorber and the electron transport layer (C60), following the approach proposed by Bao et al.2 The tunneling process is assumed to occur predominantly within the C60 region, where the electric field is strongly enhanced. The tunneling probability was described using the Wentzel-Kramers-Brillouinm approximation3, expressed as:


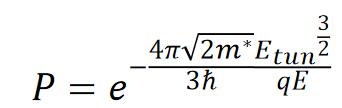


where *m∗* is the effective carrier mass, *ℏ* is the reduced Planck constant, *Etun* represents the effective tunneling barrier, and *E* is the local electric field within the tunneling region.

The associated tunneling current density was then expressed as:


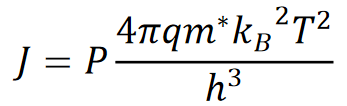


where *kB* is the Boltzmann constant, *T* is the temperature, and *h* is Planck’s constant.

Zener breakdown was incorporated into the device model as an additional carrier generation term within the tunneling region:


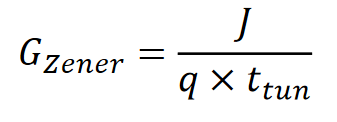


where *ttun* is the thickness of the tunneling region. Semiconductor parameters in COSMOL2,4-9:

| Parameters | NiOx | Perovskite | C60 | BCP | SnO2 | Spiro-TTB | MoO3 |
| --- | --- | --- | --- | --- | --- | --- | --- |
| Thickness **t (nm)** | 20 | 400 | 50 | 20 | 20 | 50 | 20 |
| Bandgap **Eg (eV)** | 3.66 | 1.53 | 1.8 | 3.5 | 3.5 | 3.44 | 3 |
| Electron affinity **χ** **(eV)** | 1.9 | 4.25 | 4.2 | 4.1 | 3.9 | 2.22 | 2.5 |
| Relative permittivity **εr** | 12 | 24.2 | 4.2 | 31 | 8 | 3 | 12.5 |
| Effective density of states, conduction band **Nc (cm-3)** | 1e17 | 2.5e18 | 1e20 | 1e20 | 3.16e18 | 1e20 | 2.2e18 |
| Effective density of states, valence band **Nv (cm-3)** | 1e20 | 7e18 | 1e20 | 1e20 | 2.5e19 | 1e20 | 1.8e19 |
| Electron mobility **µn (cm/s)** | 1e-6 | 2 | 1e-29 | 1e-2 | 20 | 1e-6 | 25 |
| Hole mobility **µh (cm/s)** | 3e-2 | 2 | 1e-2 | 5e-2 | 10 | 5.7e-5 | 100 |
| Donor concentration **ND (cm-3)** | - | - | 1e19 | 1e19 | 1e18 | - | - |
| Acceptor concentration **NA (cm-3)** | 1.01e20 | - | - | - | - | 1e19 | 1e19 |

**Energy yield simulation by Equivalent circuit.** The equivalent circuit of a solar cell typically comprises a current source representing the photogenerated current, a diode modeling the p-n junction, a series resistor accounting for resistive losses, and a shunt resistor capturing leakage currents.10,11 For the perovskite solar cell with an integral bypass diode, the design follows Lan et al.’s approach.12 The IBD region consists of a series resistor in series with a diode, while the isolation region includes two shunt resistors, two diodes and two current sources oriented in opposite directions, collectively representing current losses. Two PSC configurations were used to assemble a module comprising nine subcells, as illustrated in Figure 4B&C. Fractional losses were incorporated by reducing the perovskite photocurrent in the IBD regions. Equivalent circuit parameters of solar cells:

| **Component** | **Symbol** | **Setting value** |
| --- | --- | --- |
| Saturation current of perovskite diode | Io,pero | 2.17×10-14 A |
| Ideality factor of perovskite diode | Npero | 1.62 |
| Perovskite series resistance | Rs,pero | 0.15 Ω |
| Perovskite shunt resistance | Rsh,pero | 8200 Ω |
| Perovskite photocurrent | Iph,pero | 25.71 mA |
| Perovskite photocurrent with IBD | Iph,pero_IBD | 23.74 mA |
| Current in isolation region | Iiso1 | 0.00108 mA |
| Current in isolation region | Iiso2 | 0 mA |
| Isolation region shunt resistance 1 | Rsh1 | 6000 Ω |
| Isolation region shunt resistance 2 | Rsh2 | 6000 Ω |
| IBD series resistance | Rs,IBD | 0.01 Ω |
| Applied voltage | V | -2 ~ 12 V |

**Supplementary Figures**


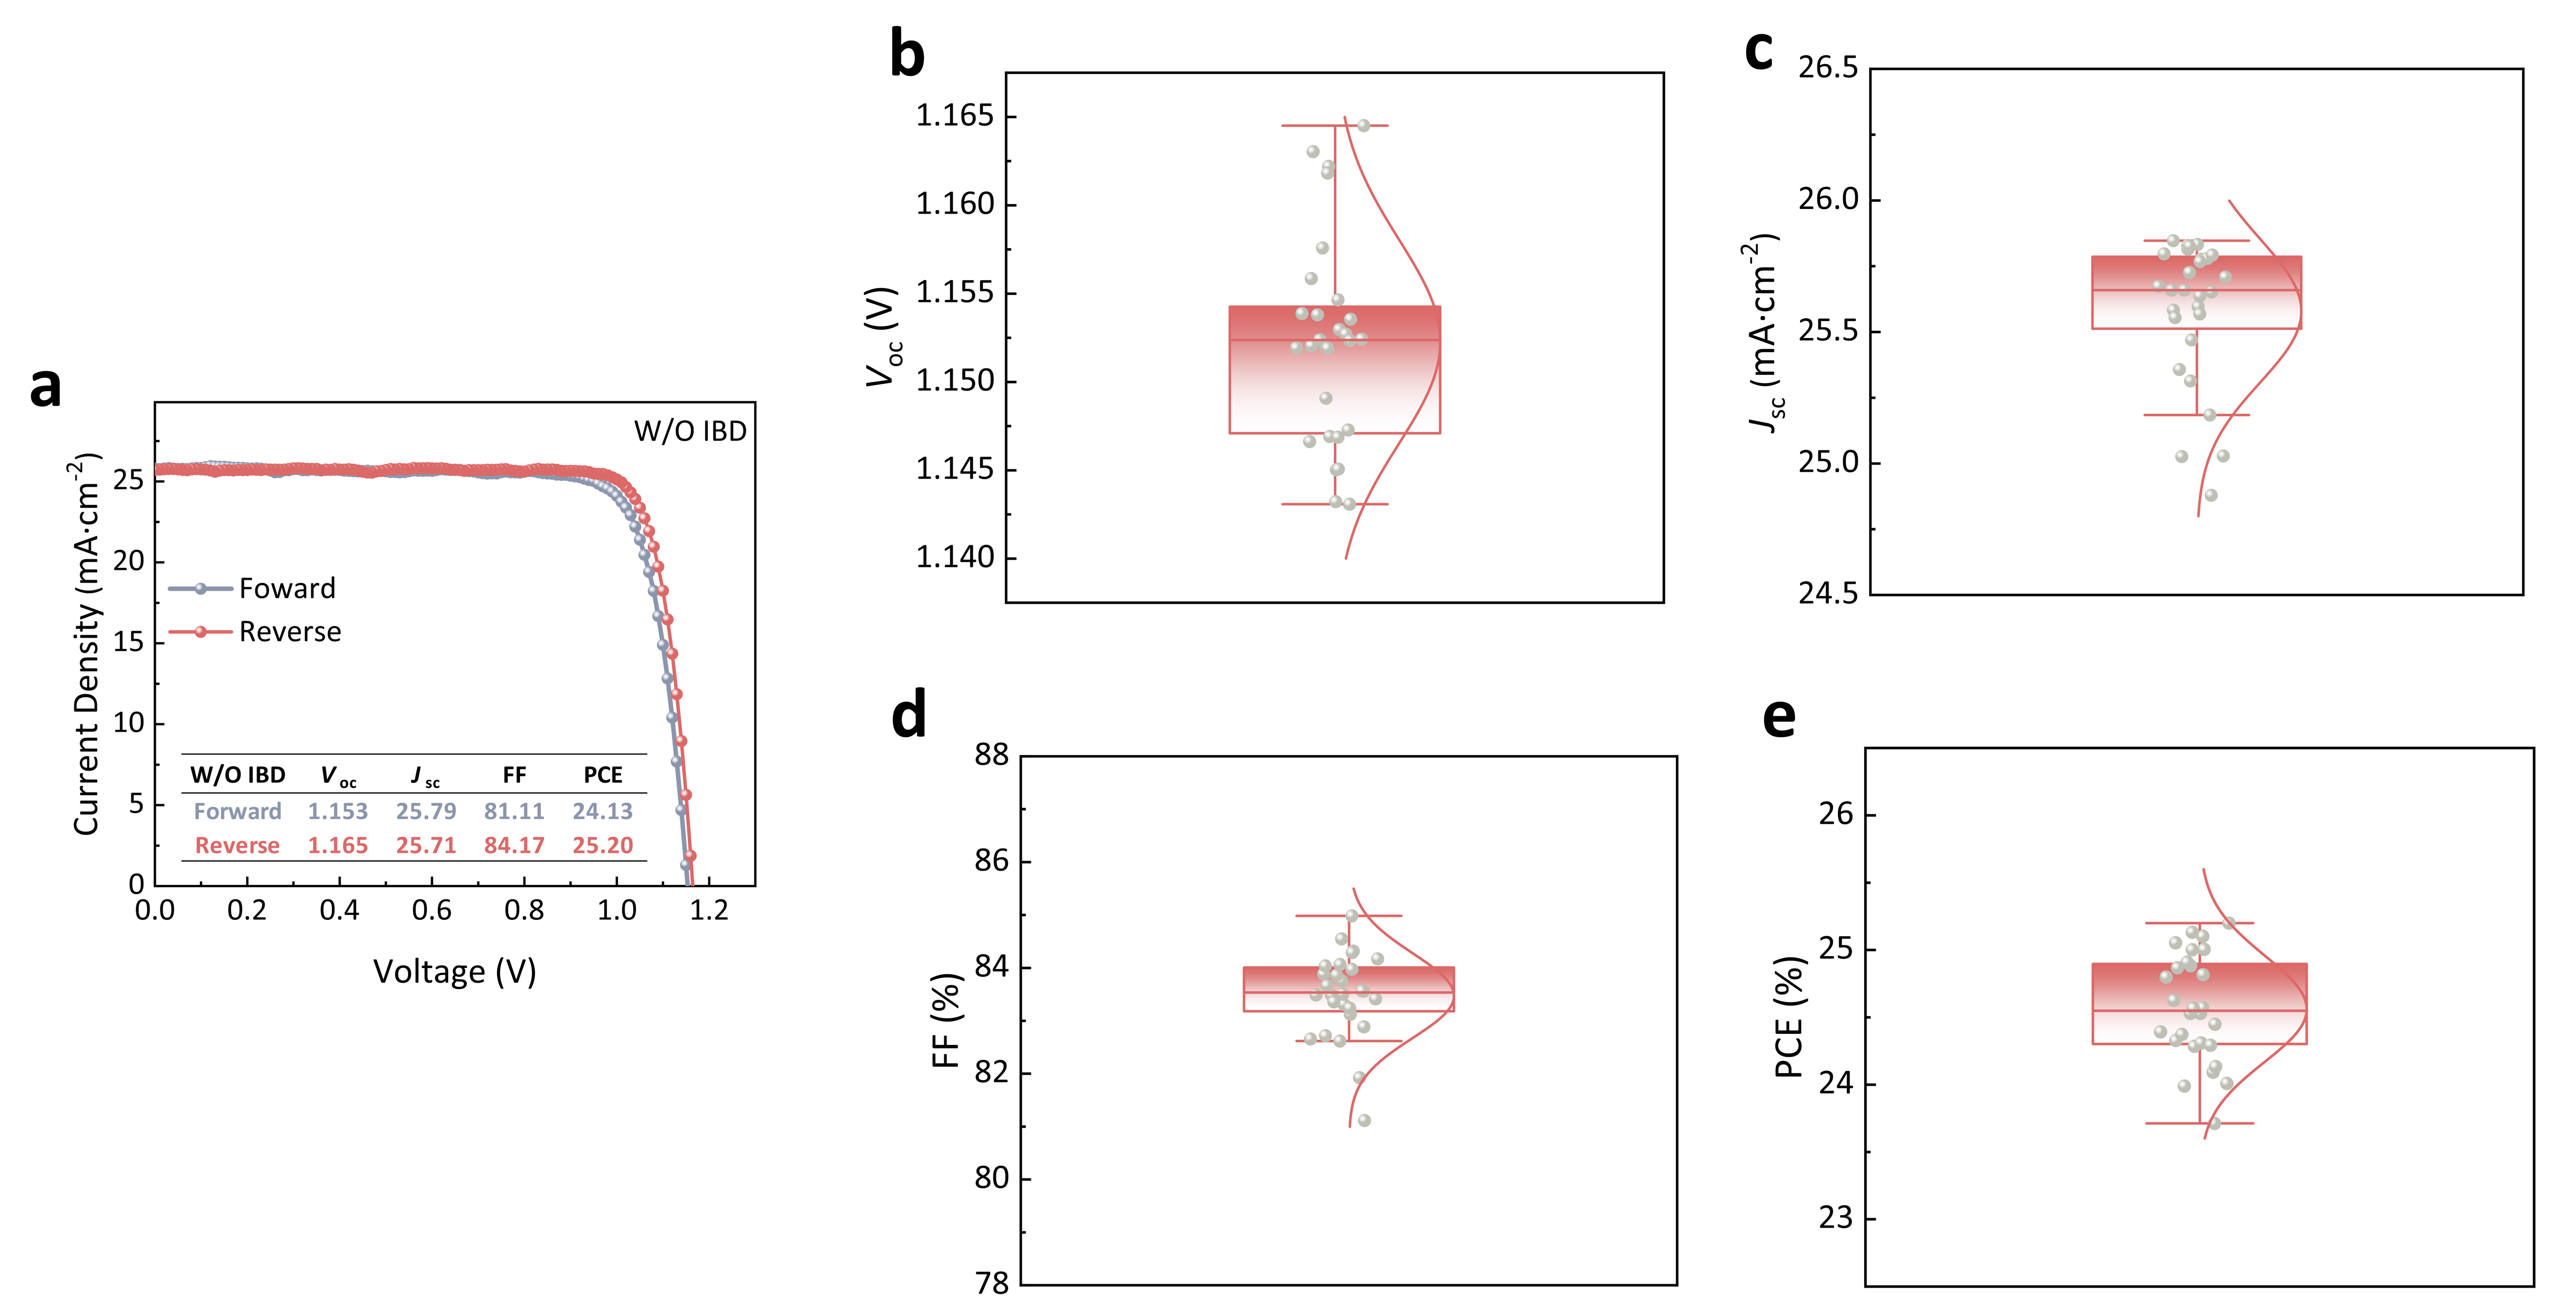


**Fig 1.** The device performance of PSCs W/O IBD. a, *J-V* curves. Statistic b, *V*oc, c, *J*sc, d, FF and e, PCE.


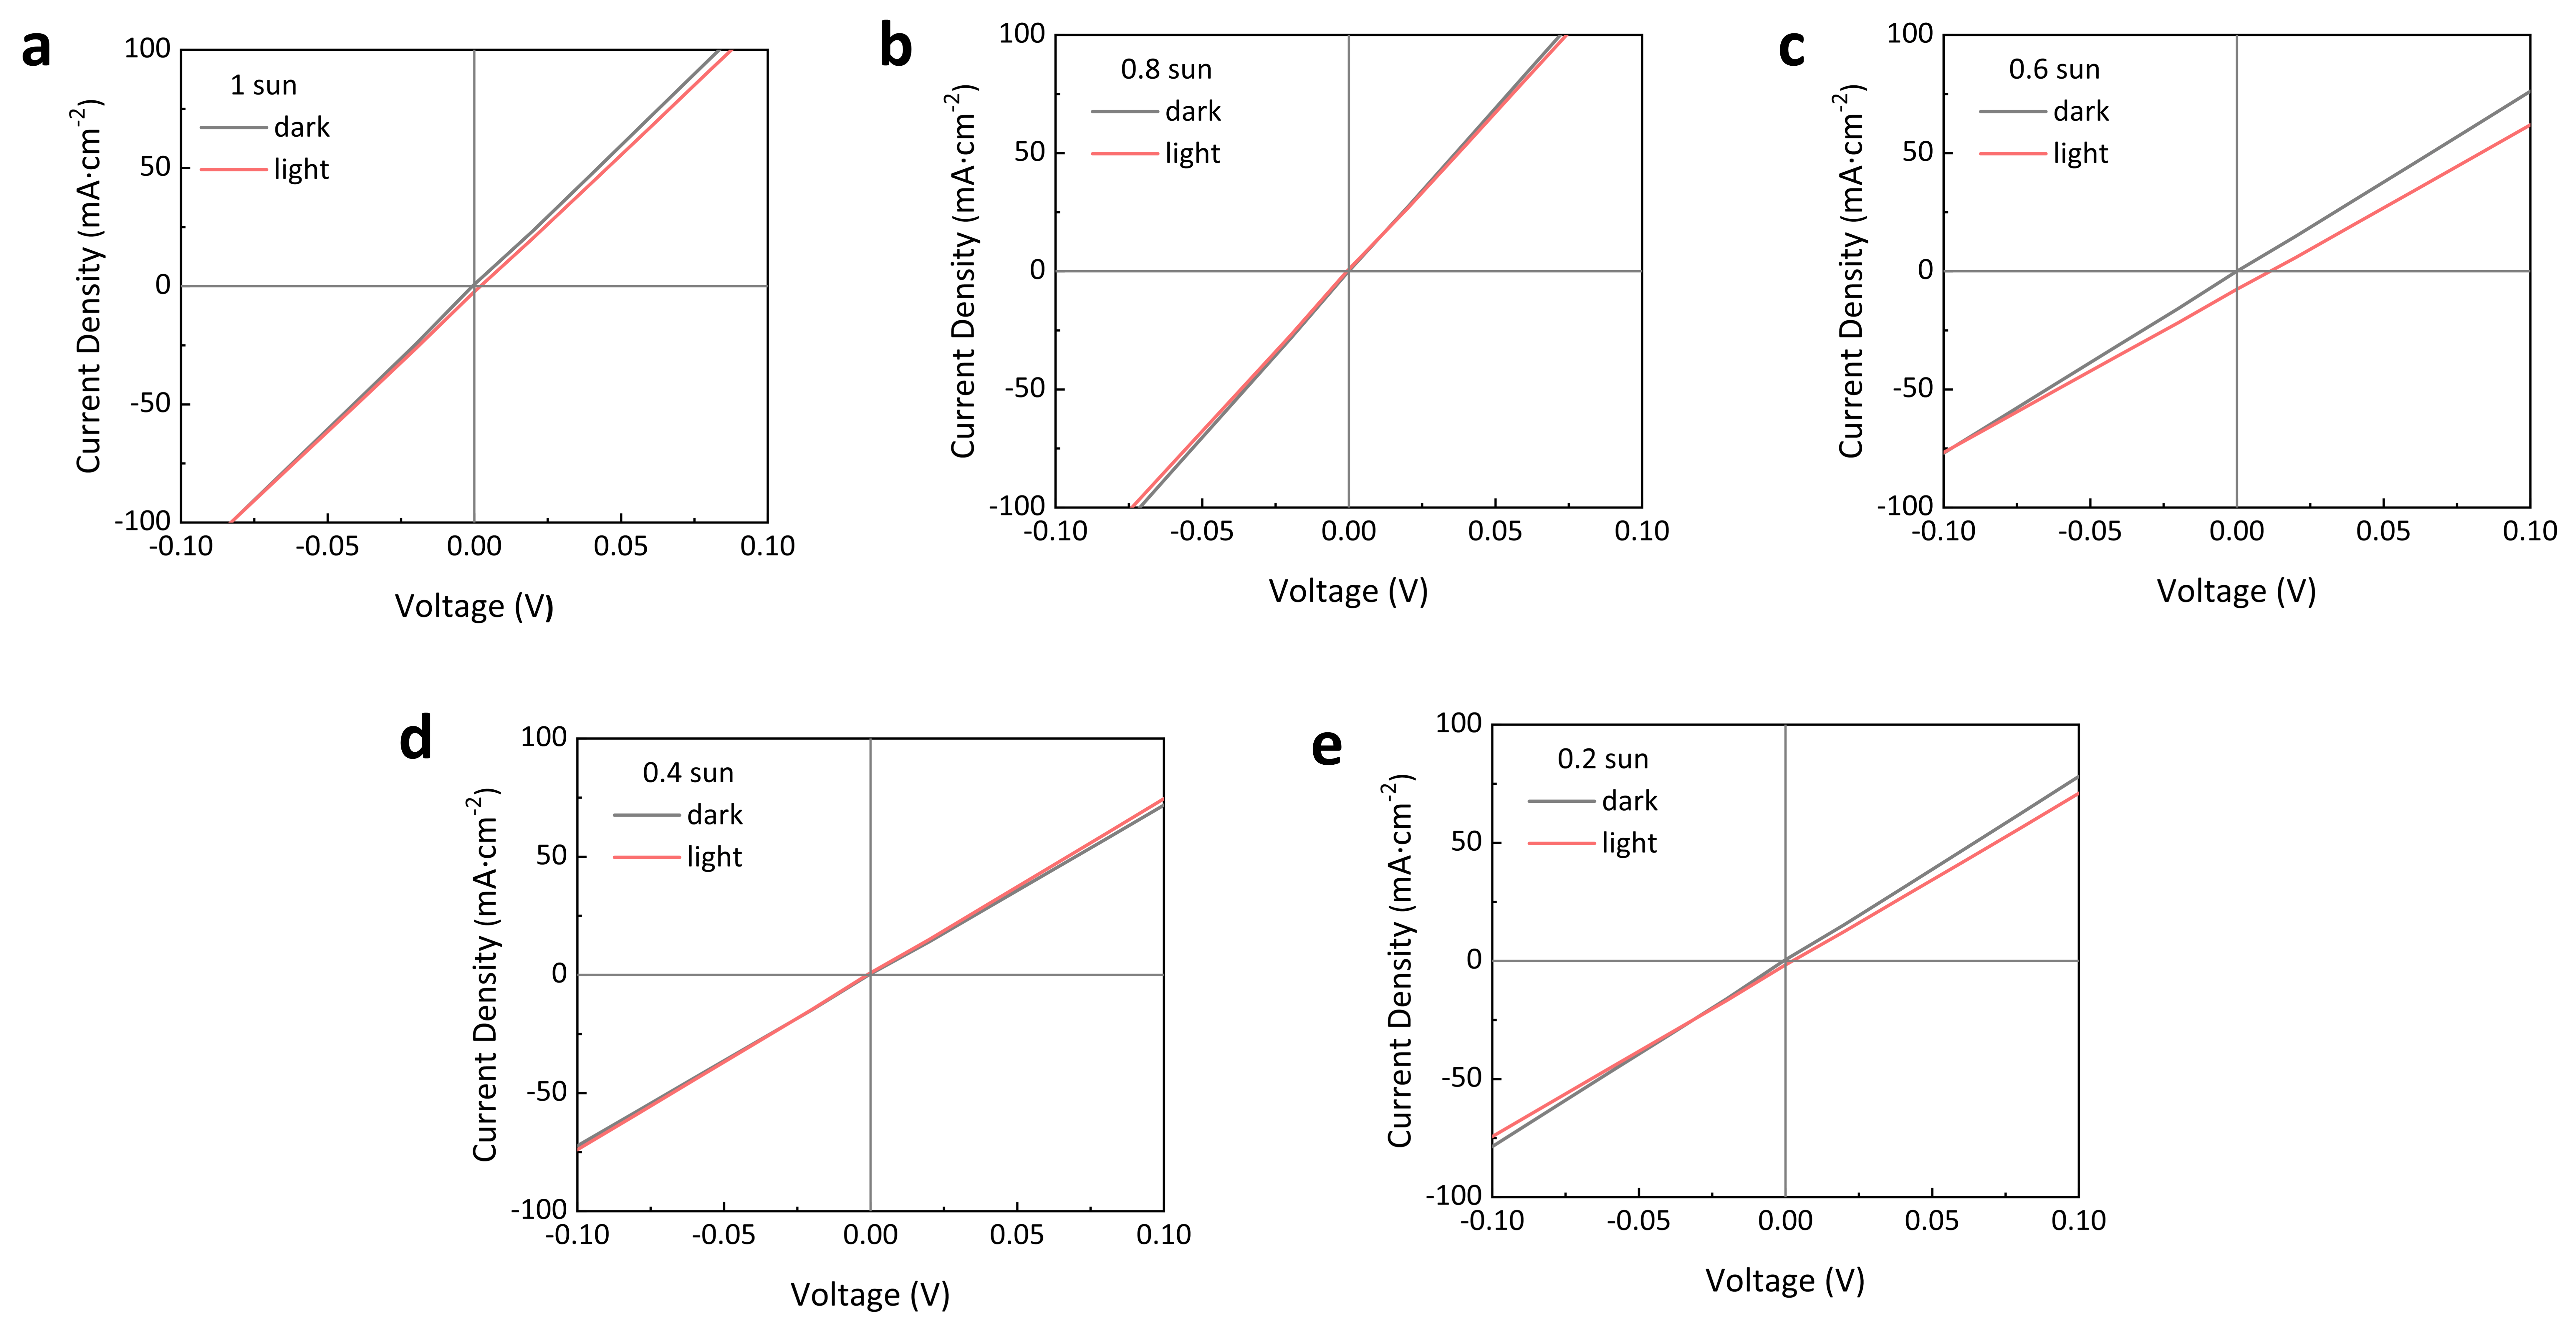


**Fig 2**. *J-V* curves of PSCs W/O IBD after reverse bias breakdown under different light intensity. a, 1 sun; b, 0.8 sun; c, 0.6 sun; d, 0.4 sun; e, 0.2 sun.


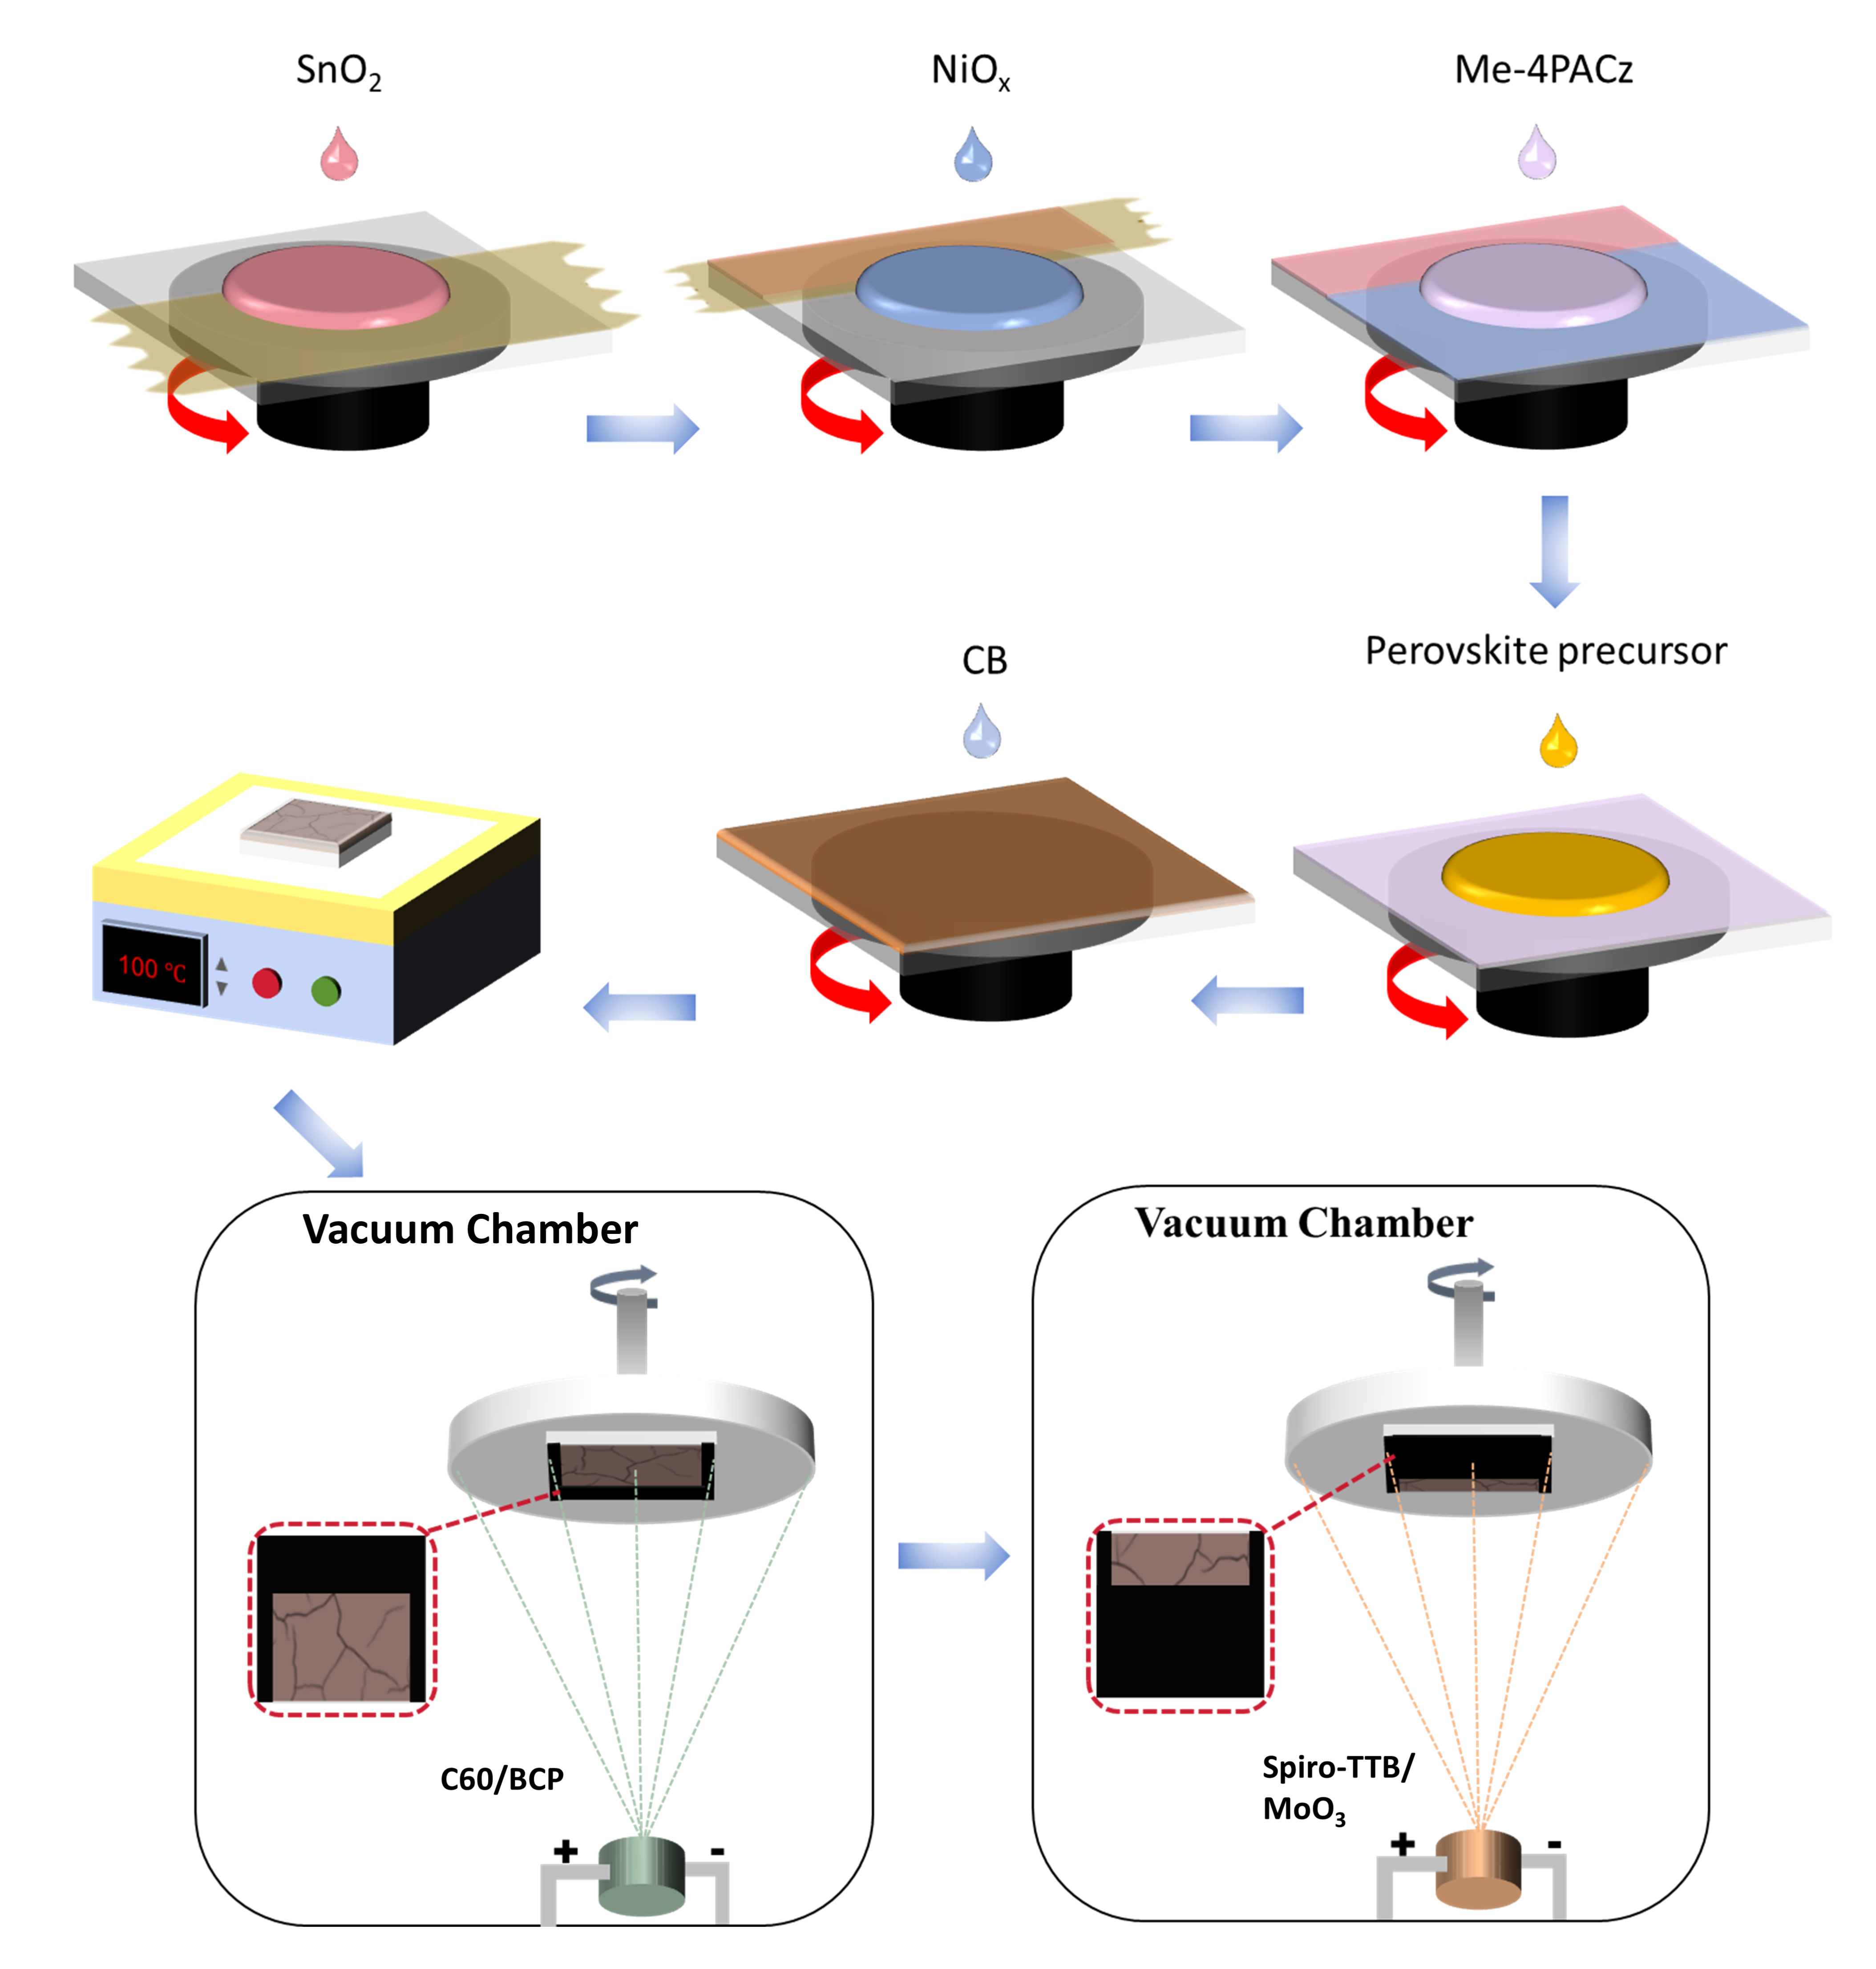


**Fig 3.** Scheme of integrating IBD device into a p-i-n PSC by sequential deposition process.





**Fig 4.** *J-T* curves of PSC with IBD aged at different external applied reverse bias for 48 hours.


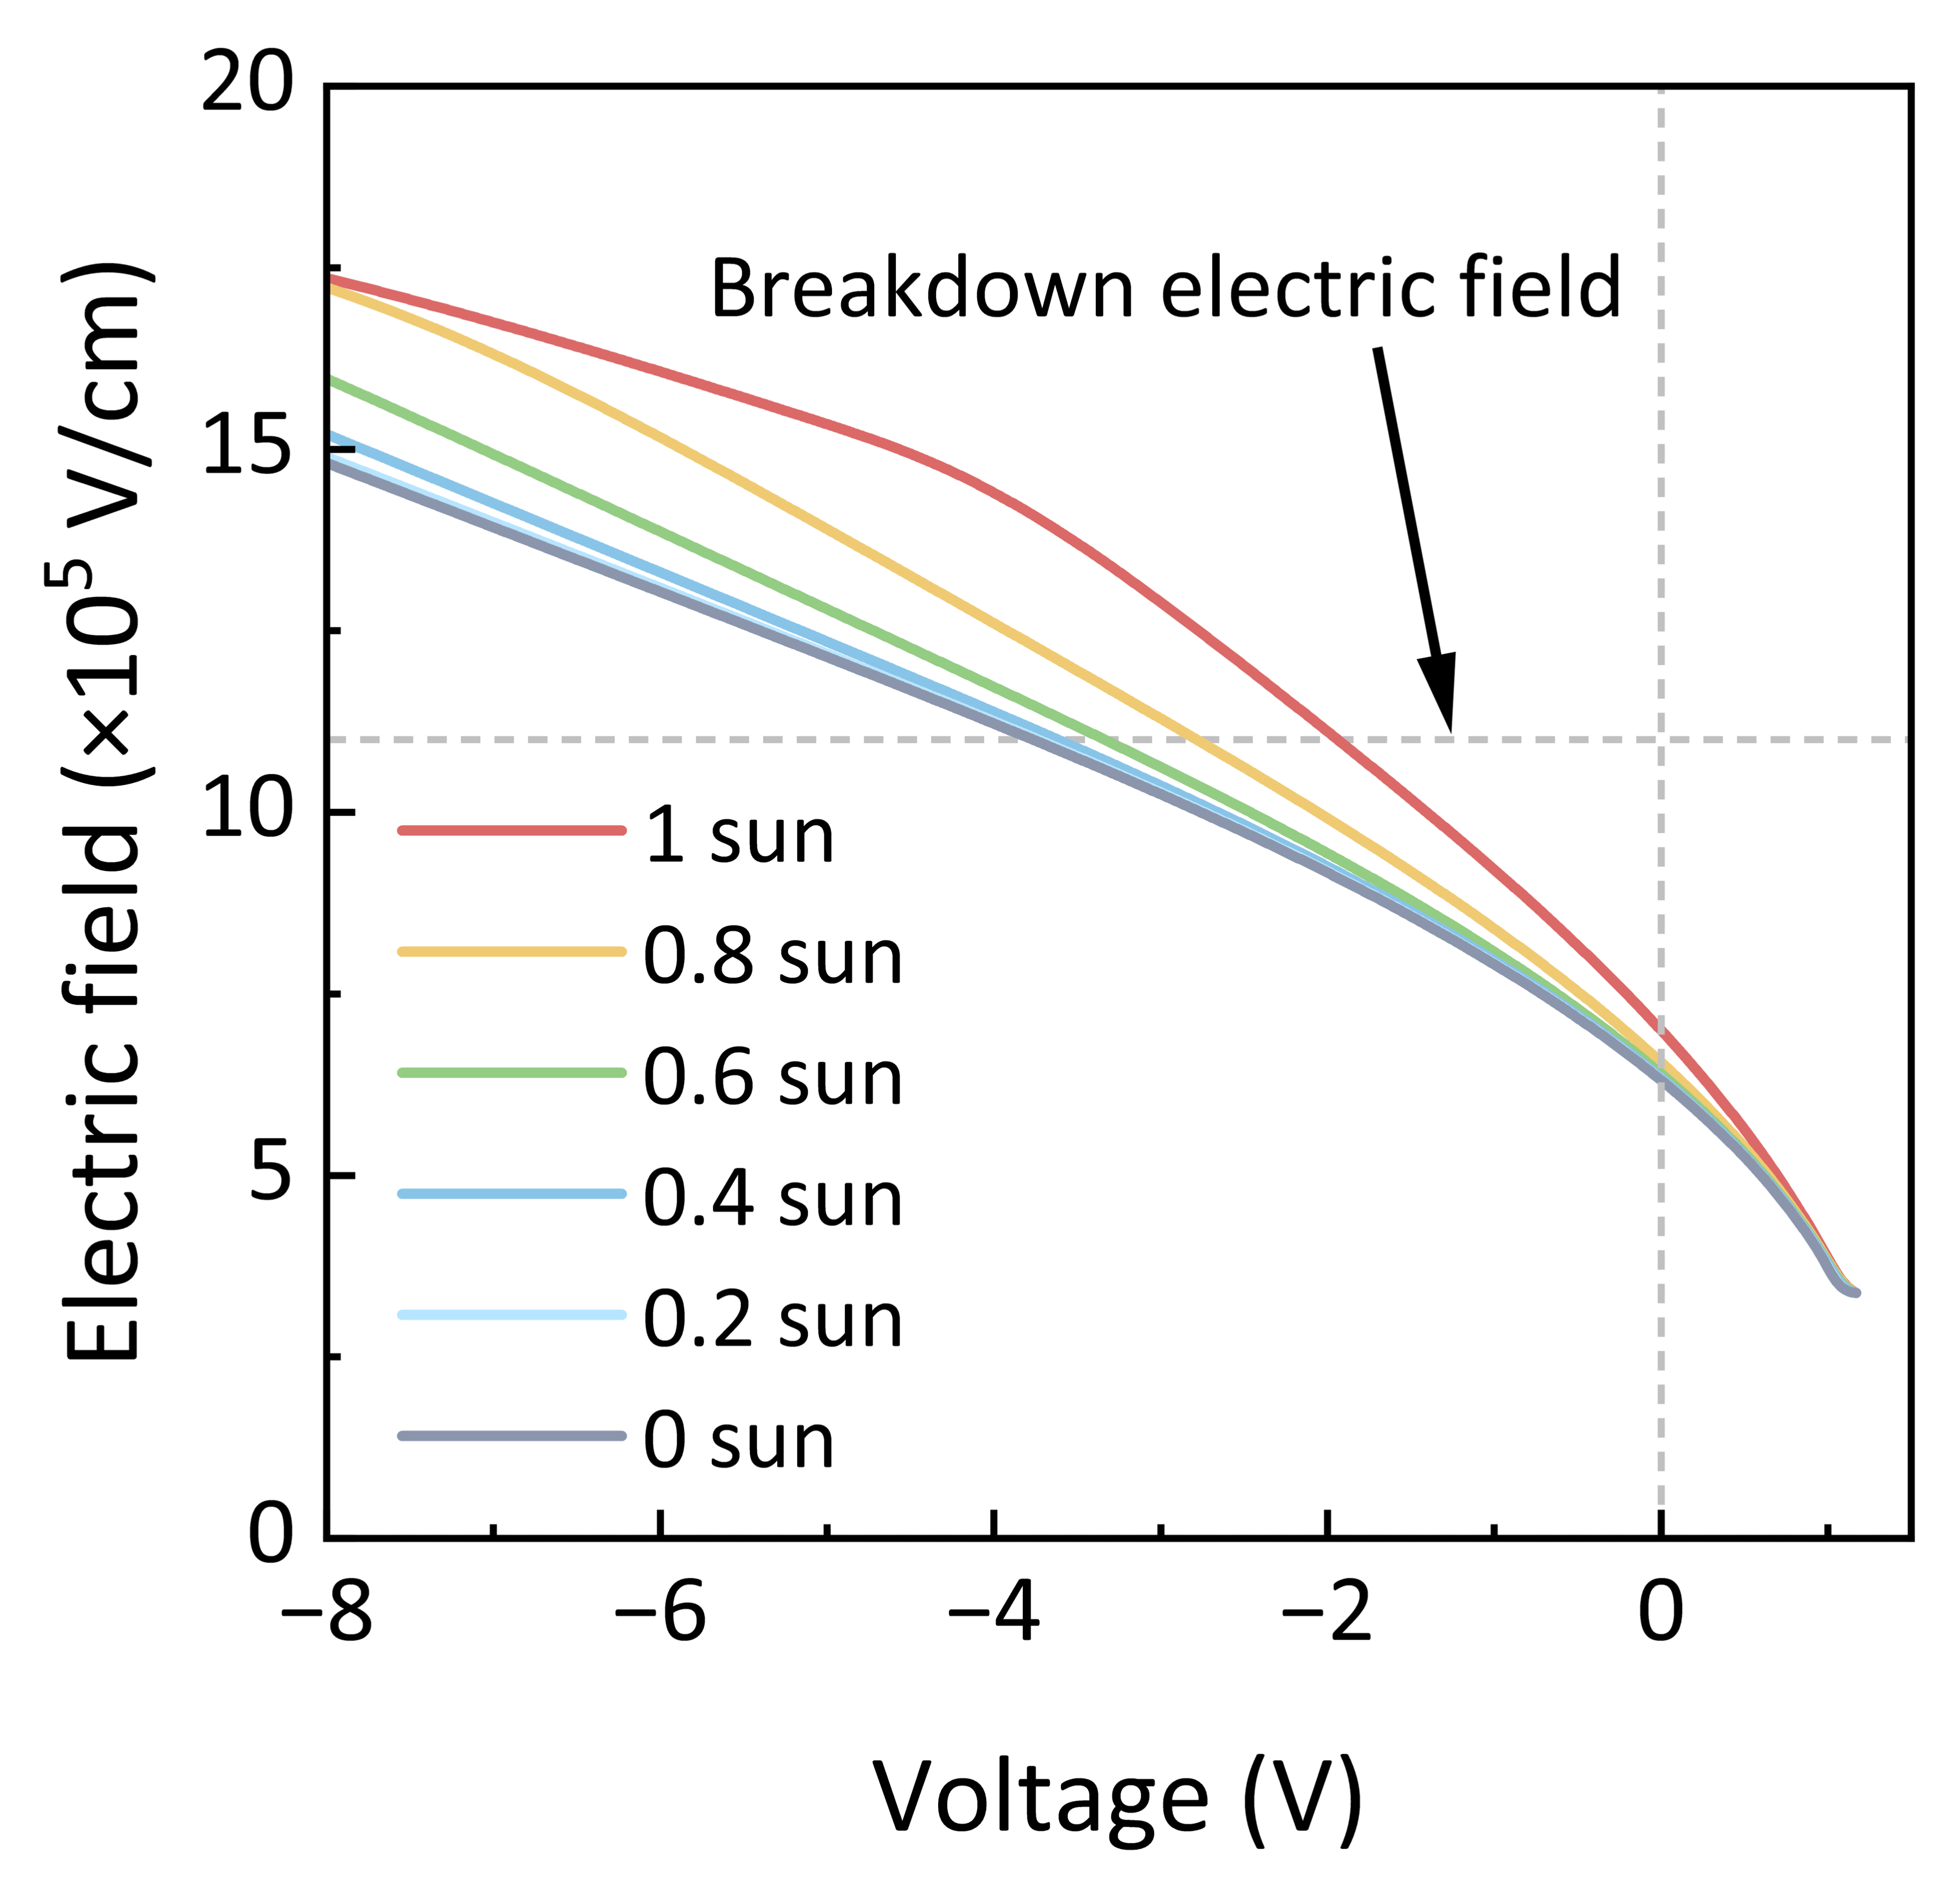


**Fig 5**. Peak electric field strength at the perovskite-HTL junction as a function of illumination level where illumination influences ion mobility according to the functional relationship defined in previous section. When the field strength reaches the critical electric field breakdown threshold for Zener tunneling (dashed line), a breakdown current flows.


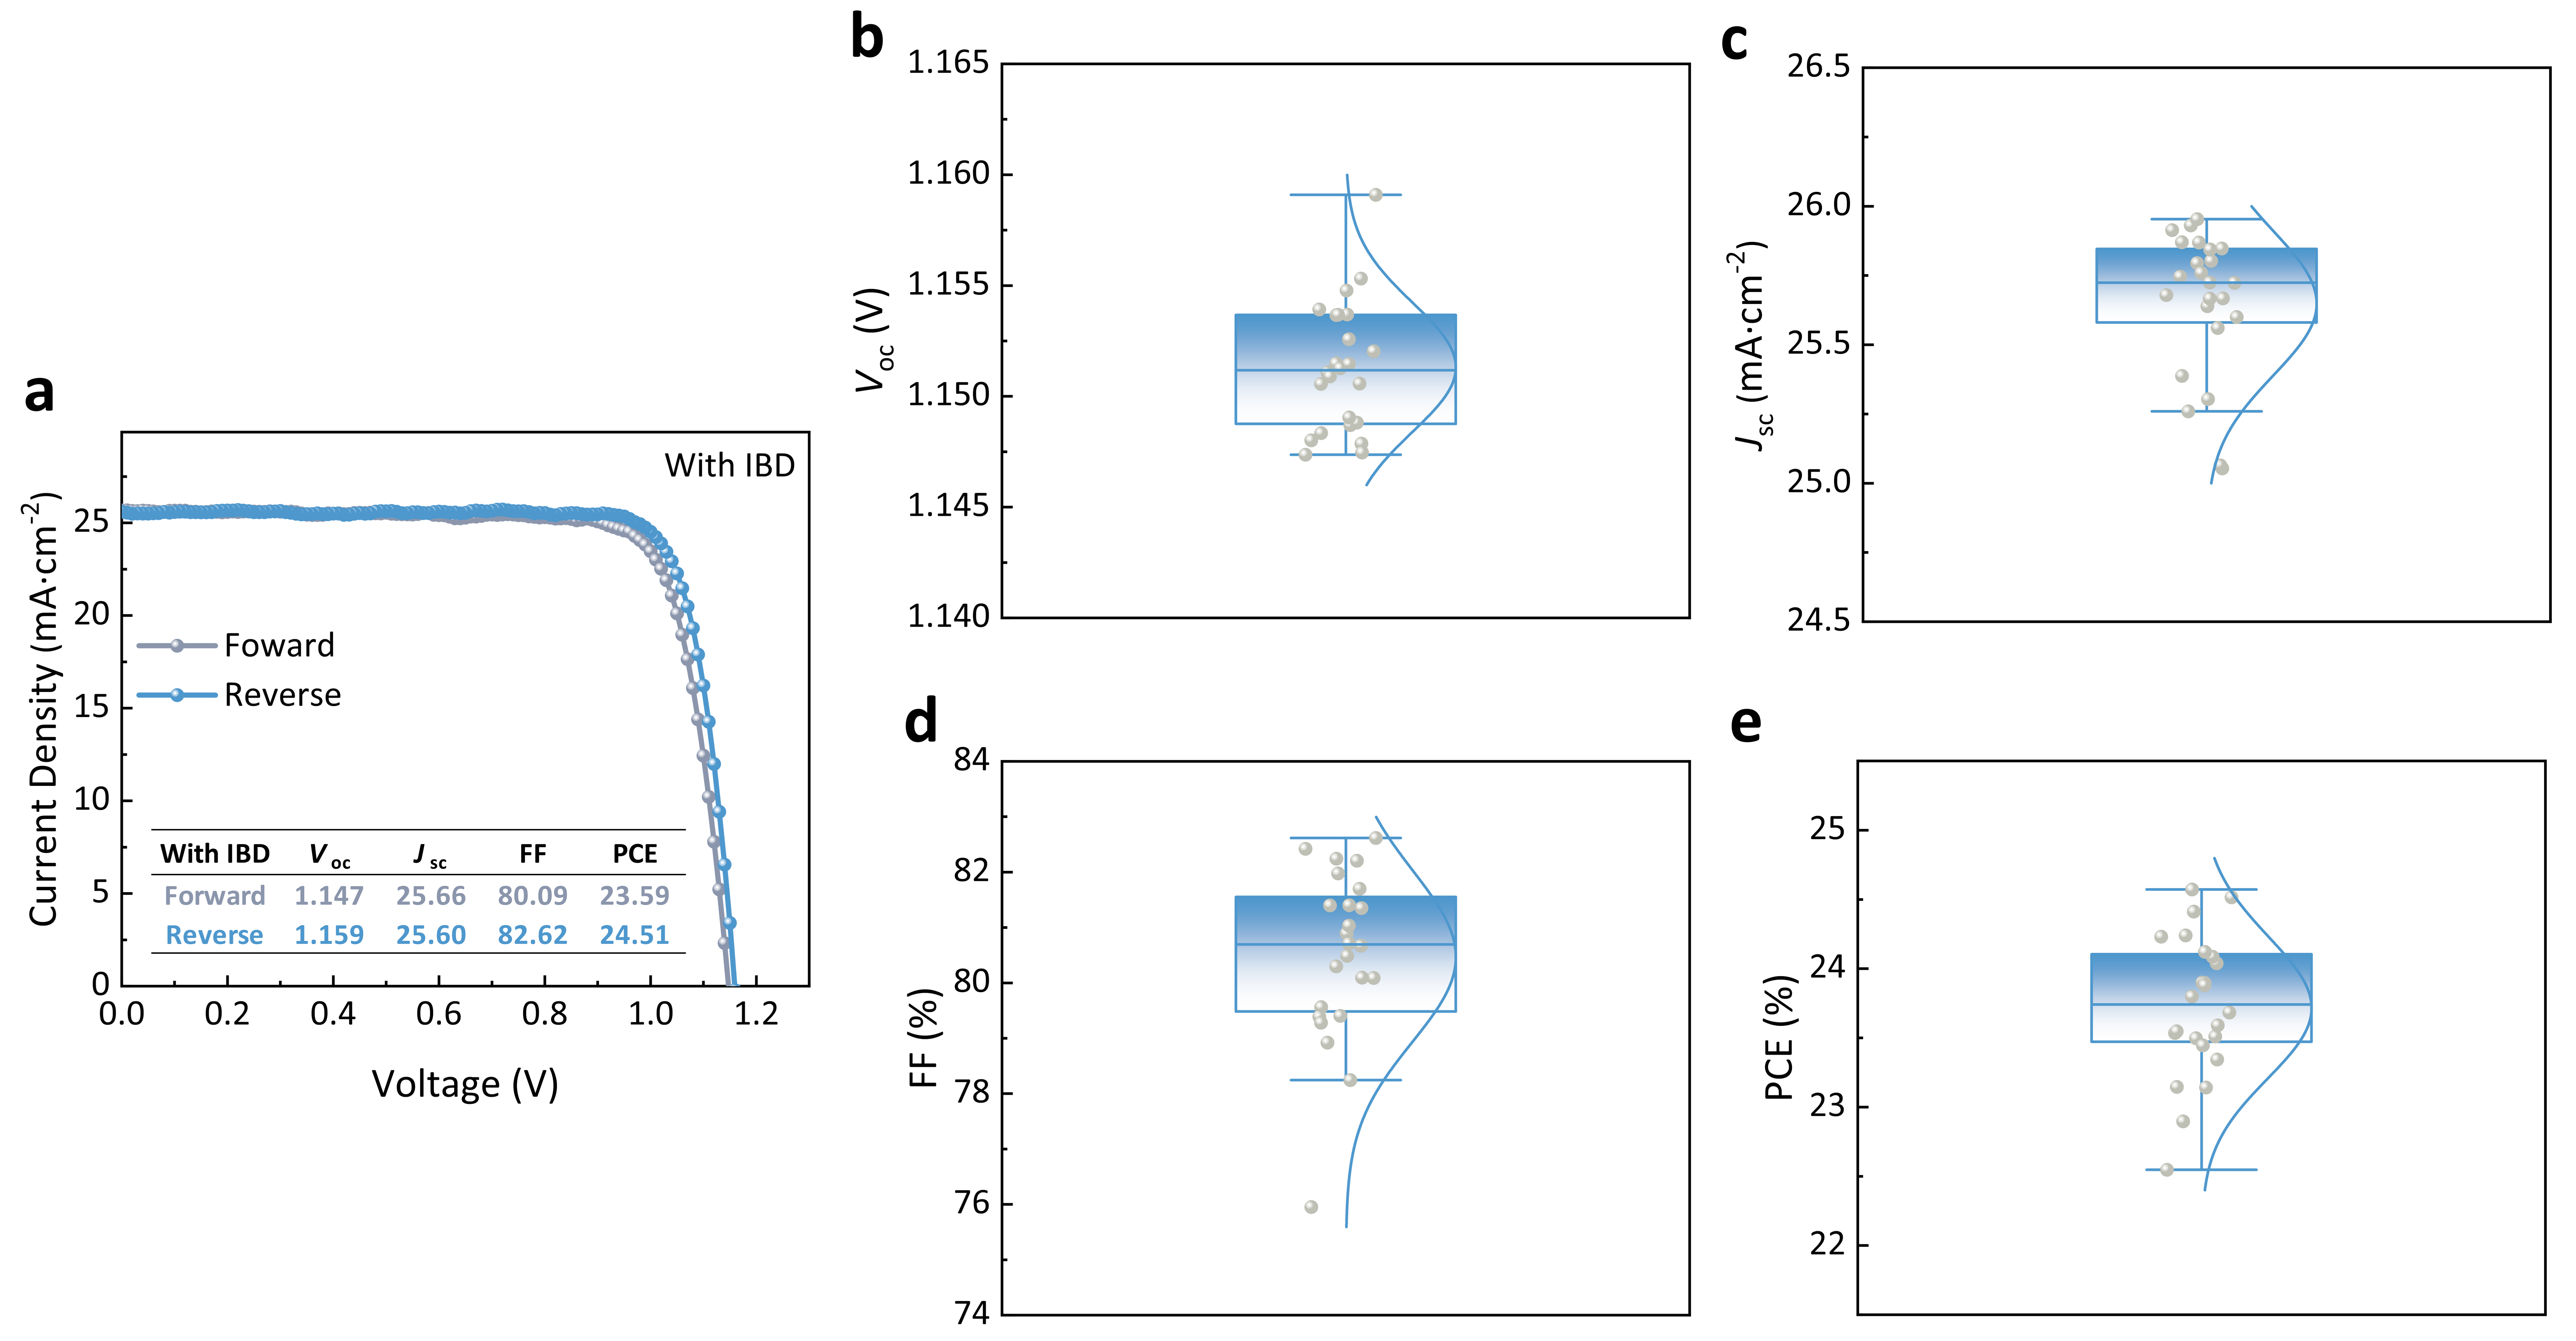


**Fig 6.** The device performance of PSCs with IBD. a, *J-V* curves. Statistic b, *V*oc, c, *J*sc, d, FF and e, PCE.


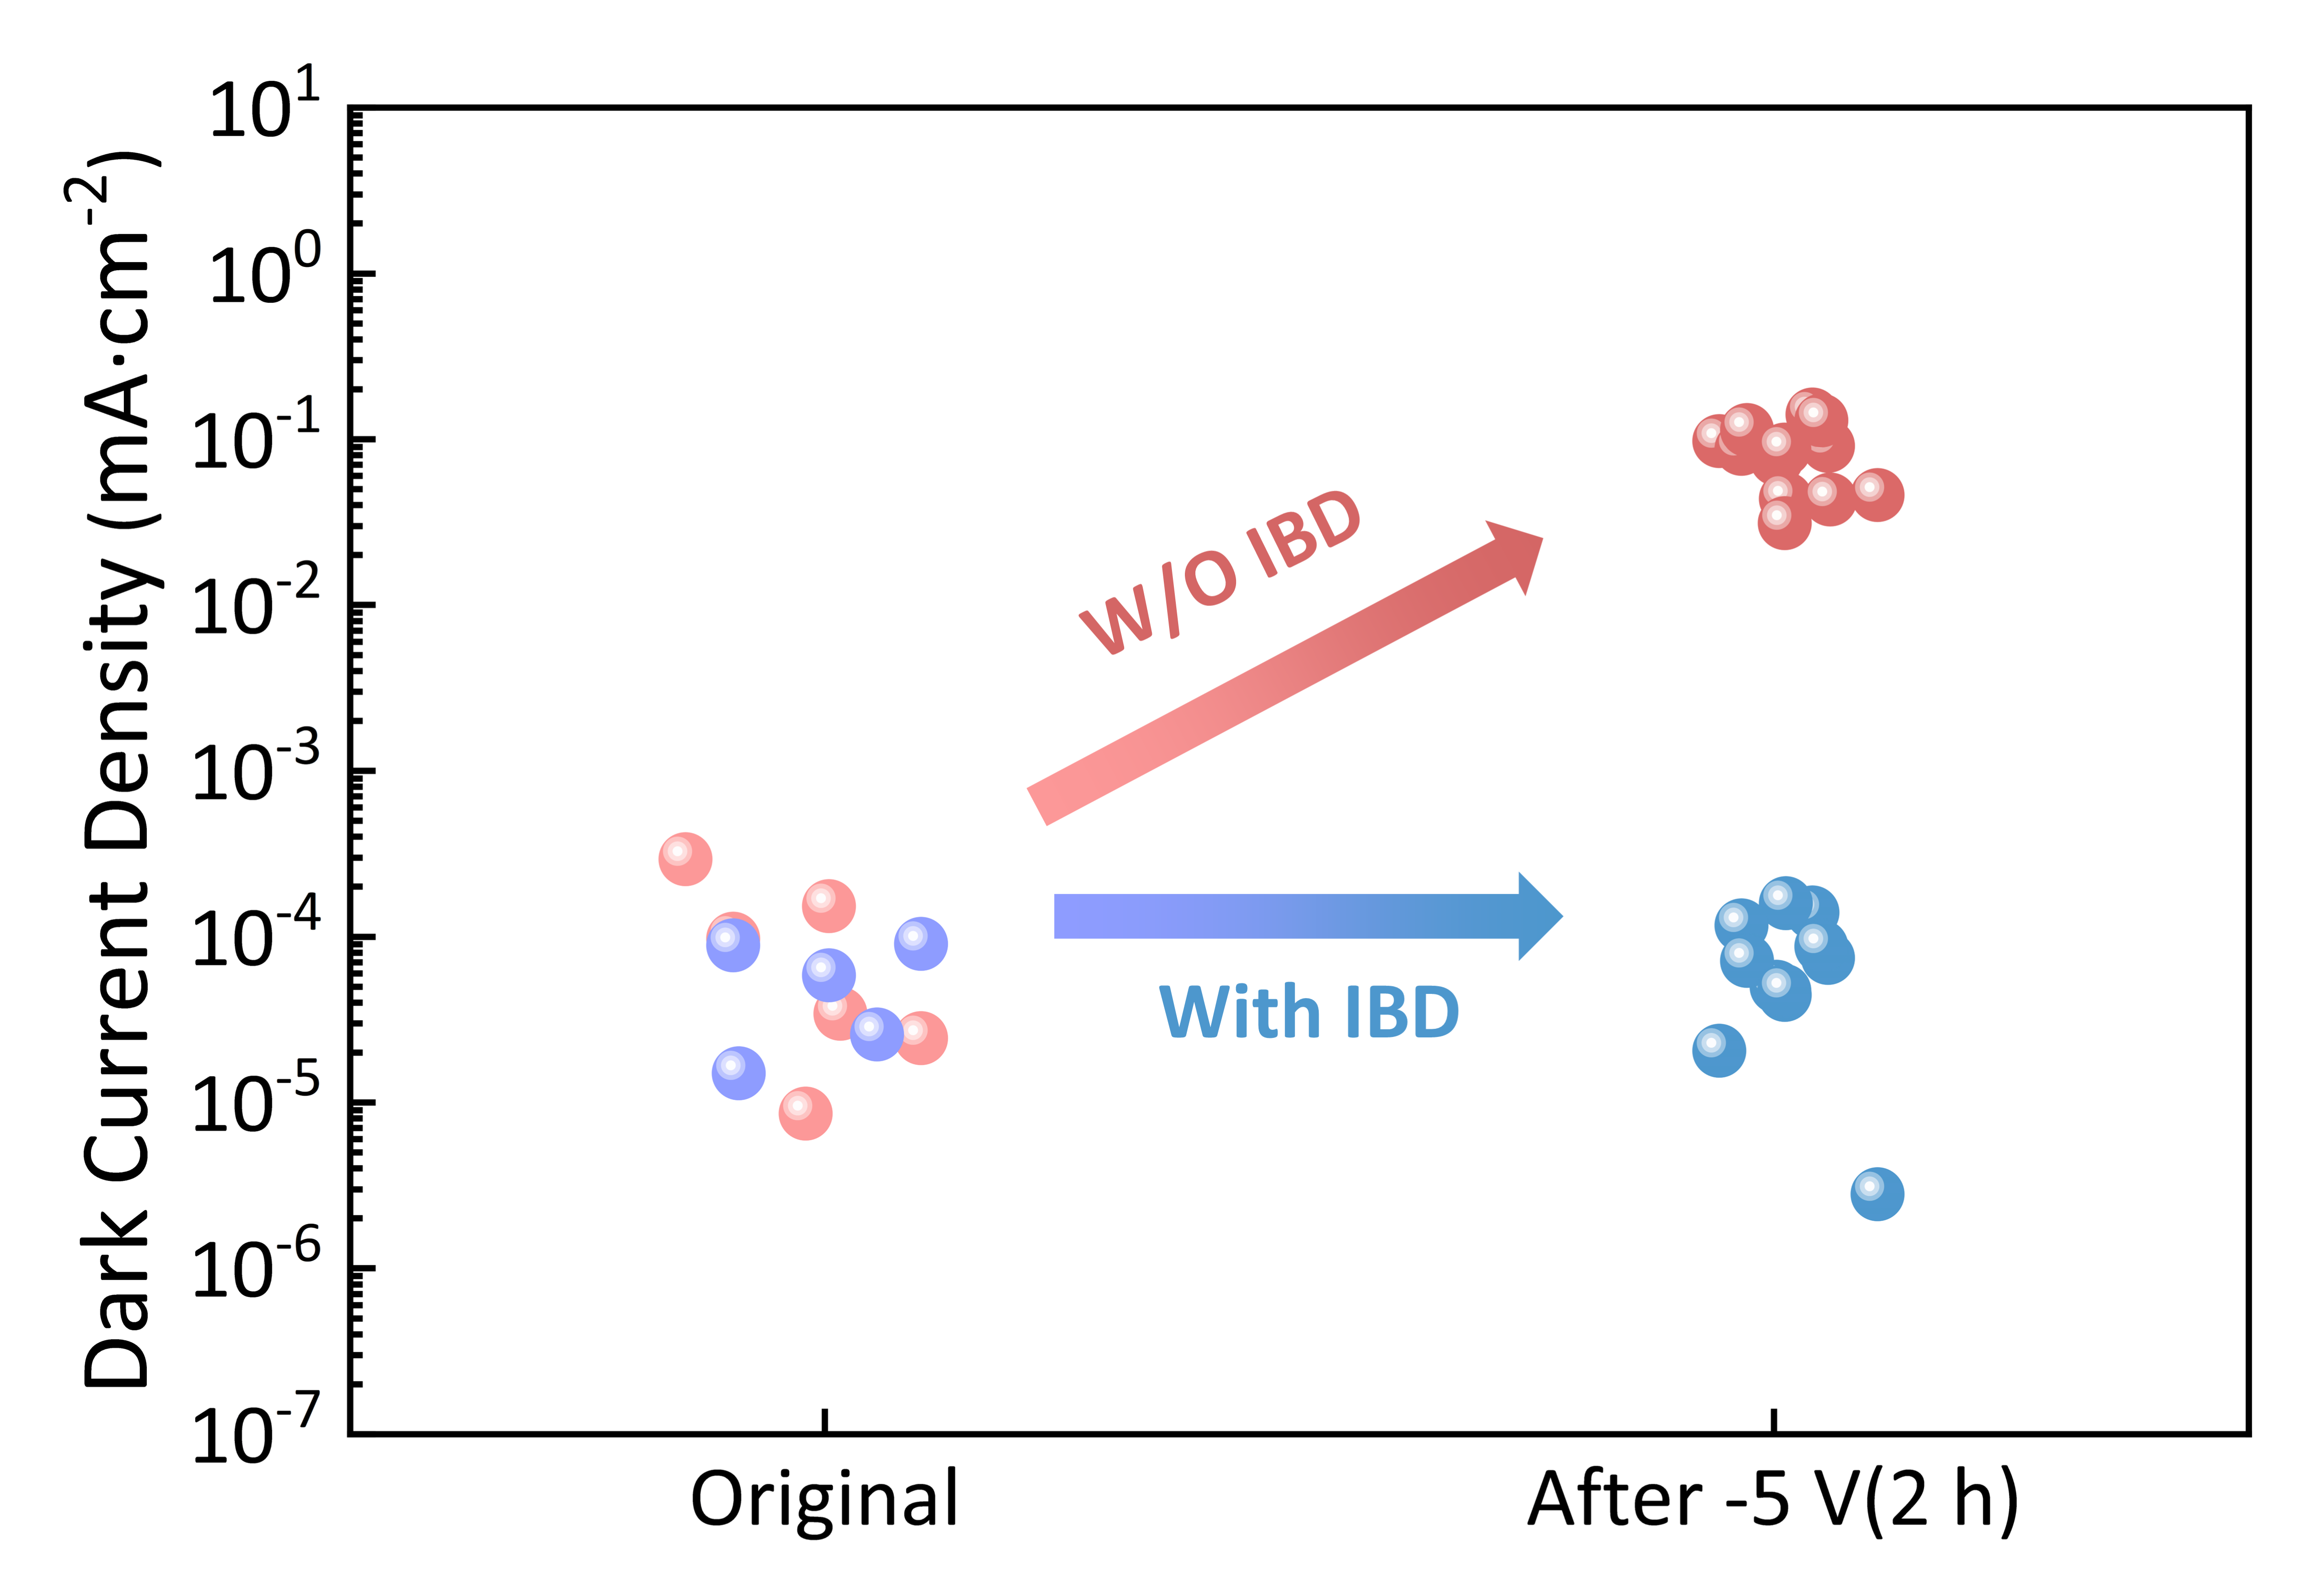


**Fig 7.** Statistic dark current density of PSCs W/O and with IBD after reverse bias. All devices were aged at -5 V external applied bias for 2 h. The devices W/O IBD have been breakdown.


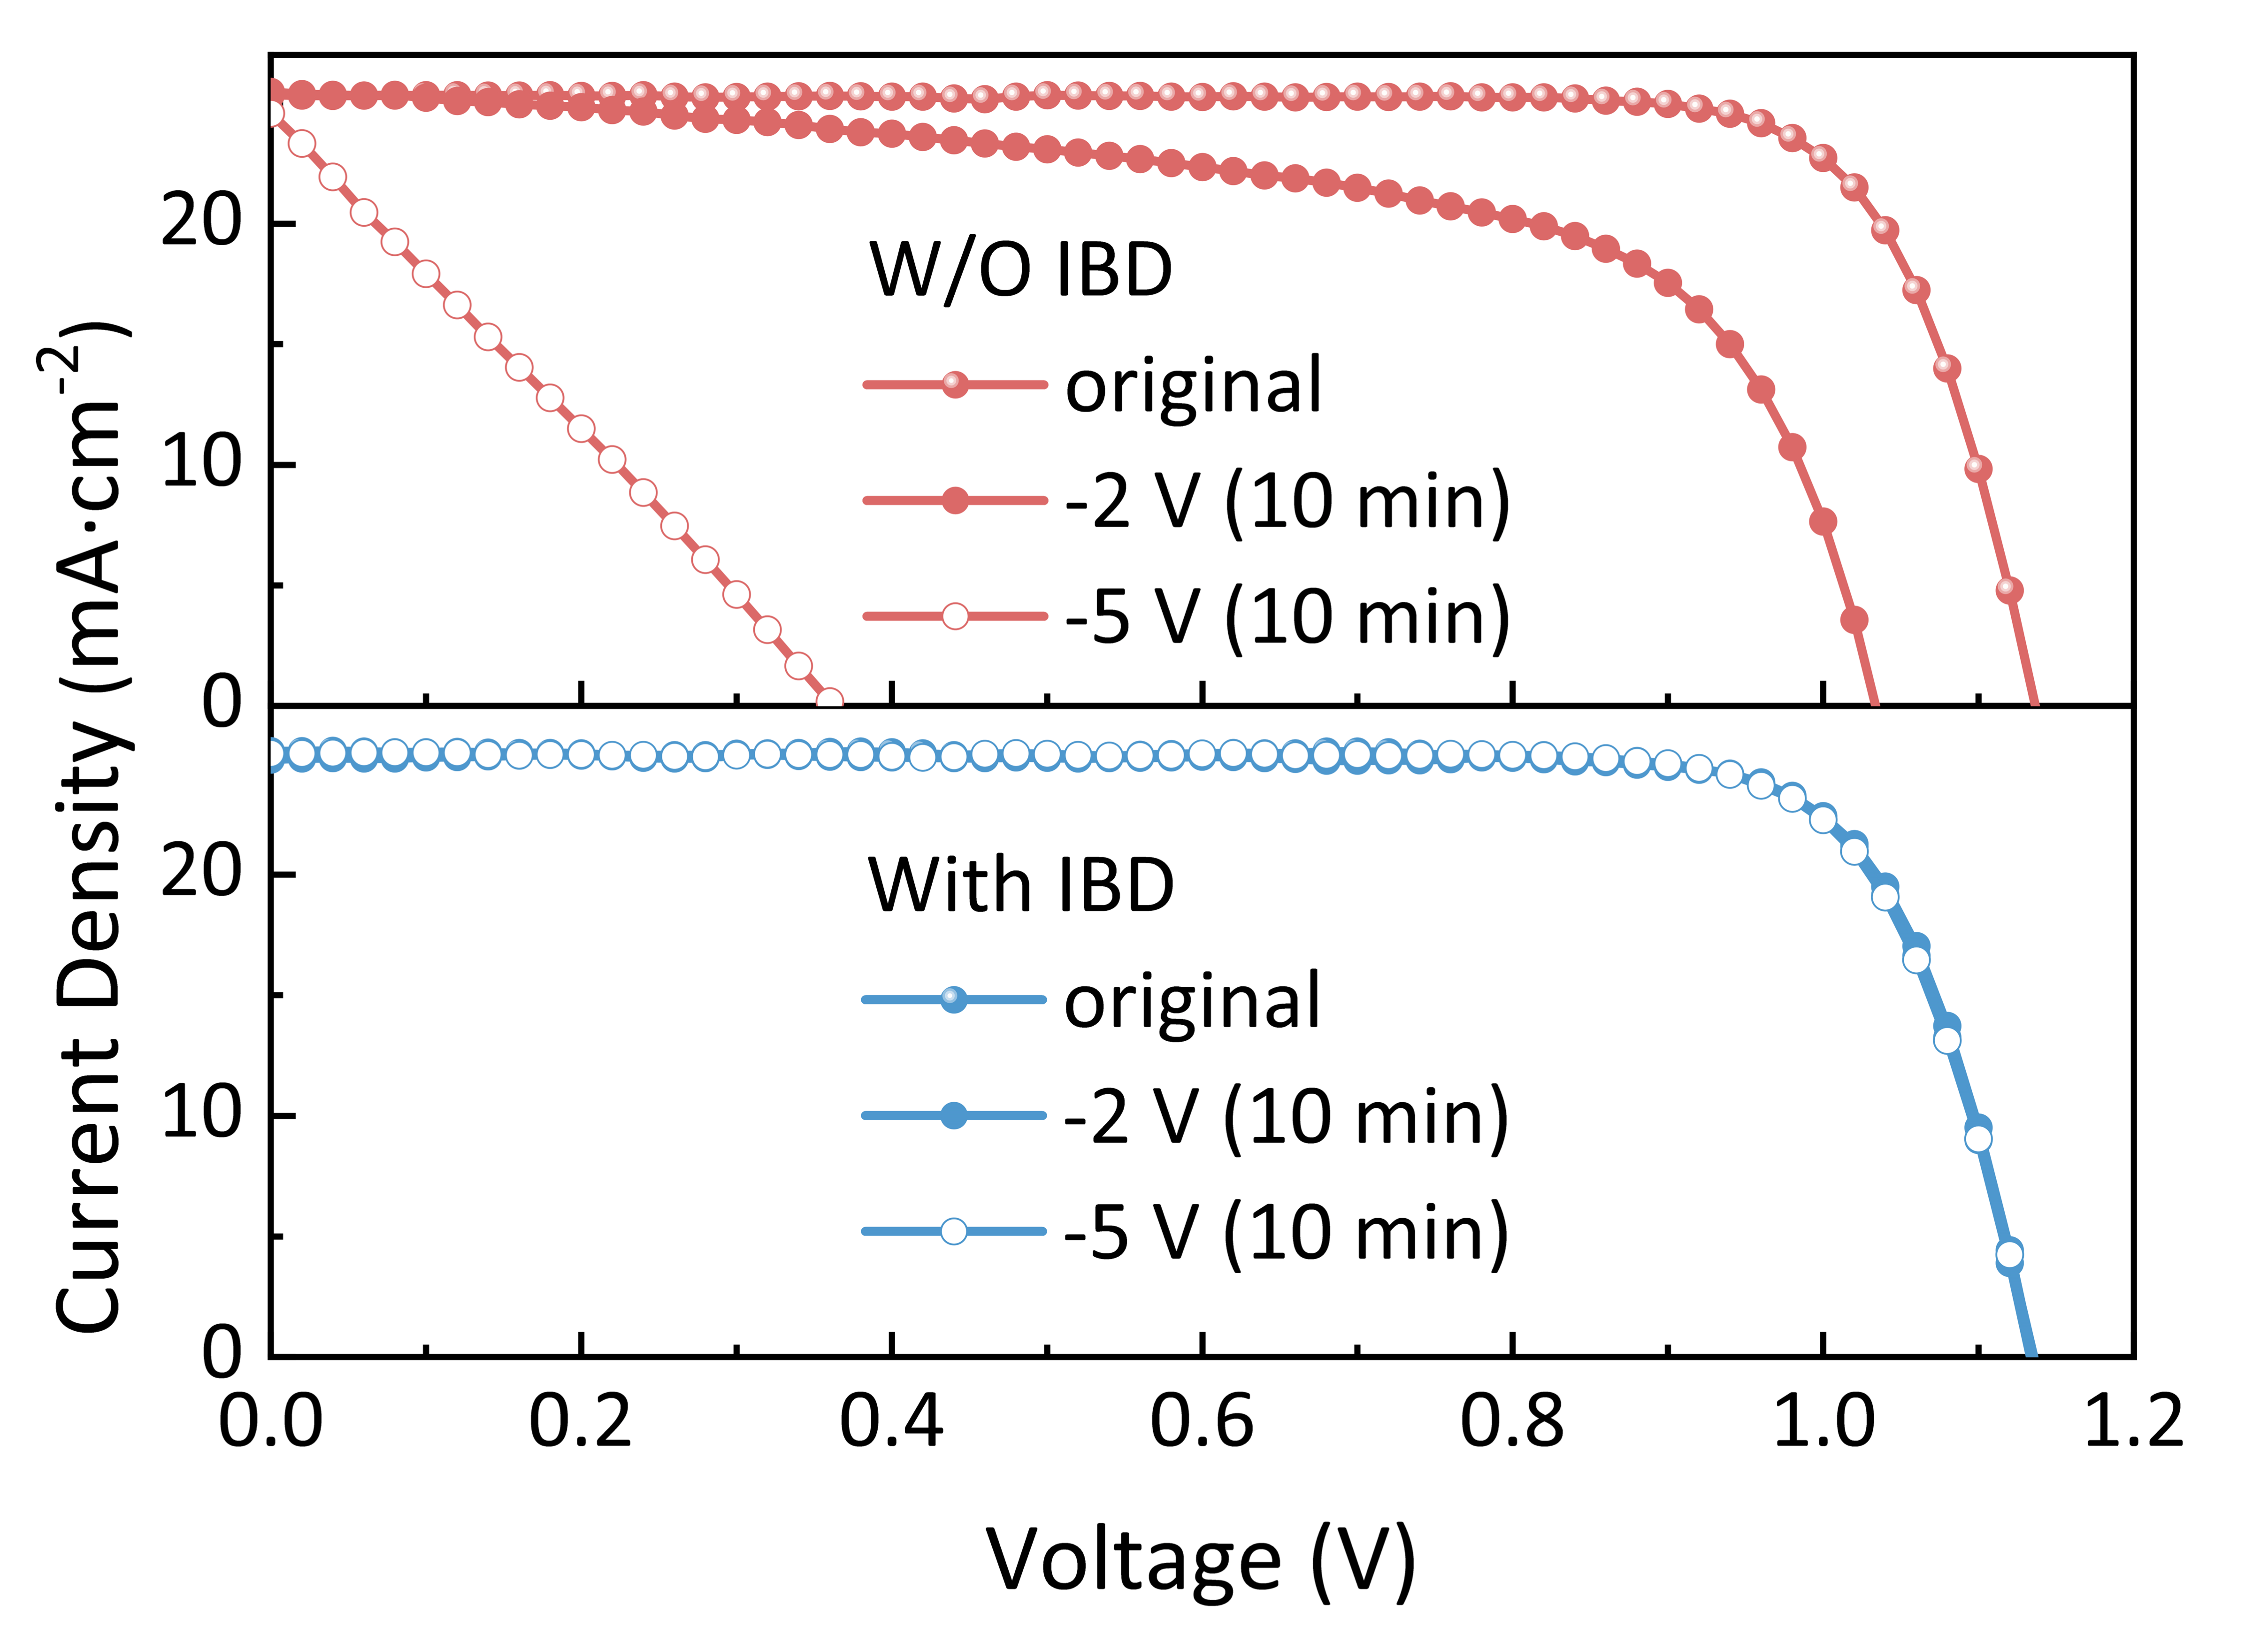


**Fig 8.** Comparison of *J-V* curves of PSCs W/O (up) and with (bottom) IBD before and after bias treatment.


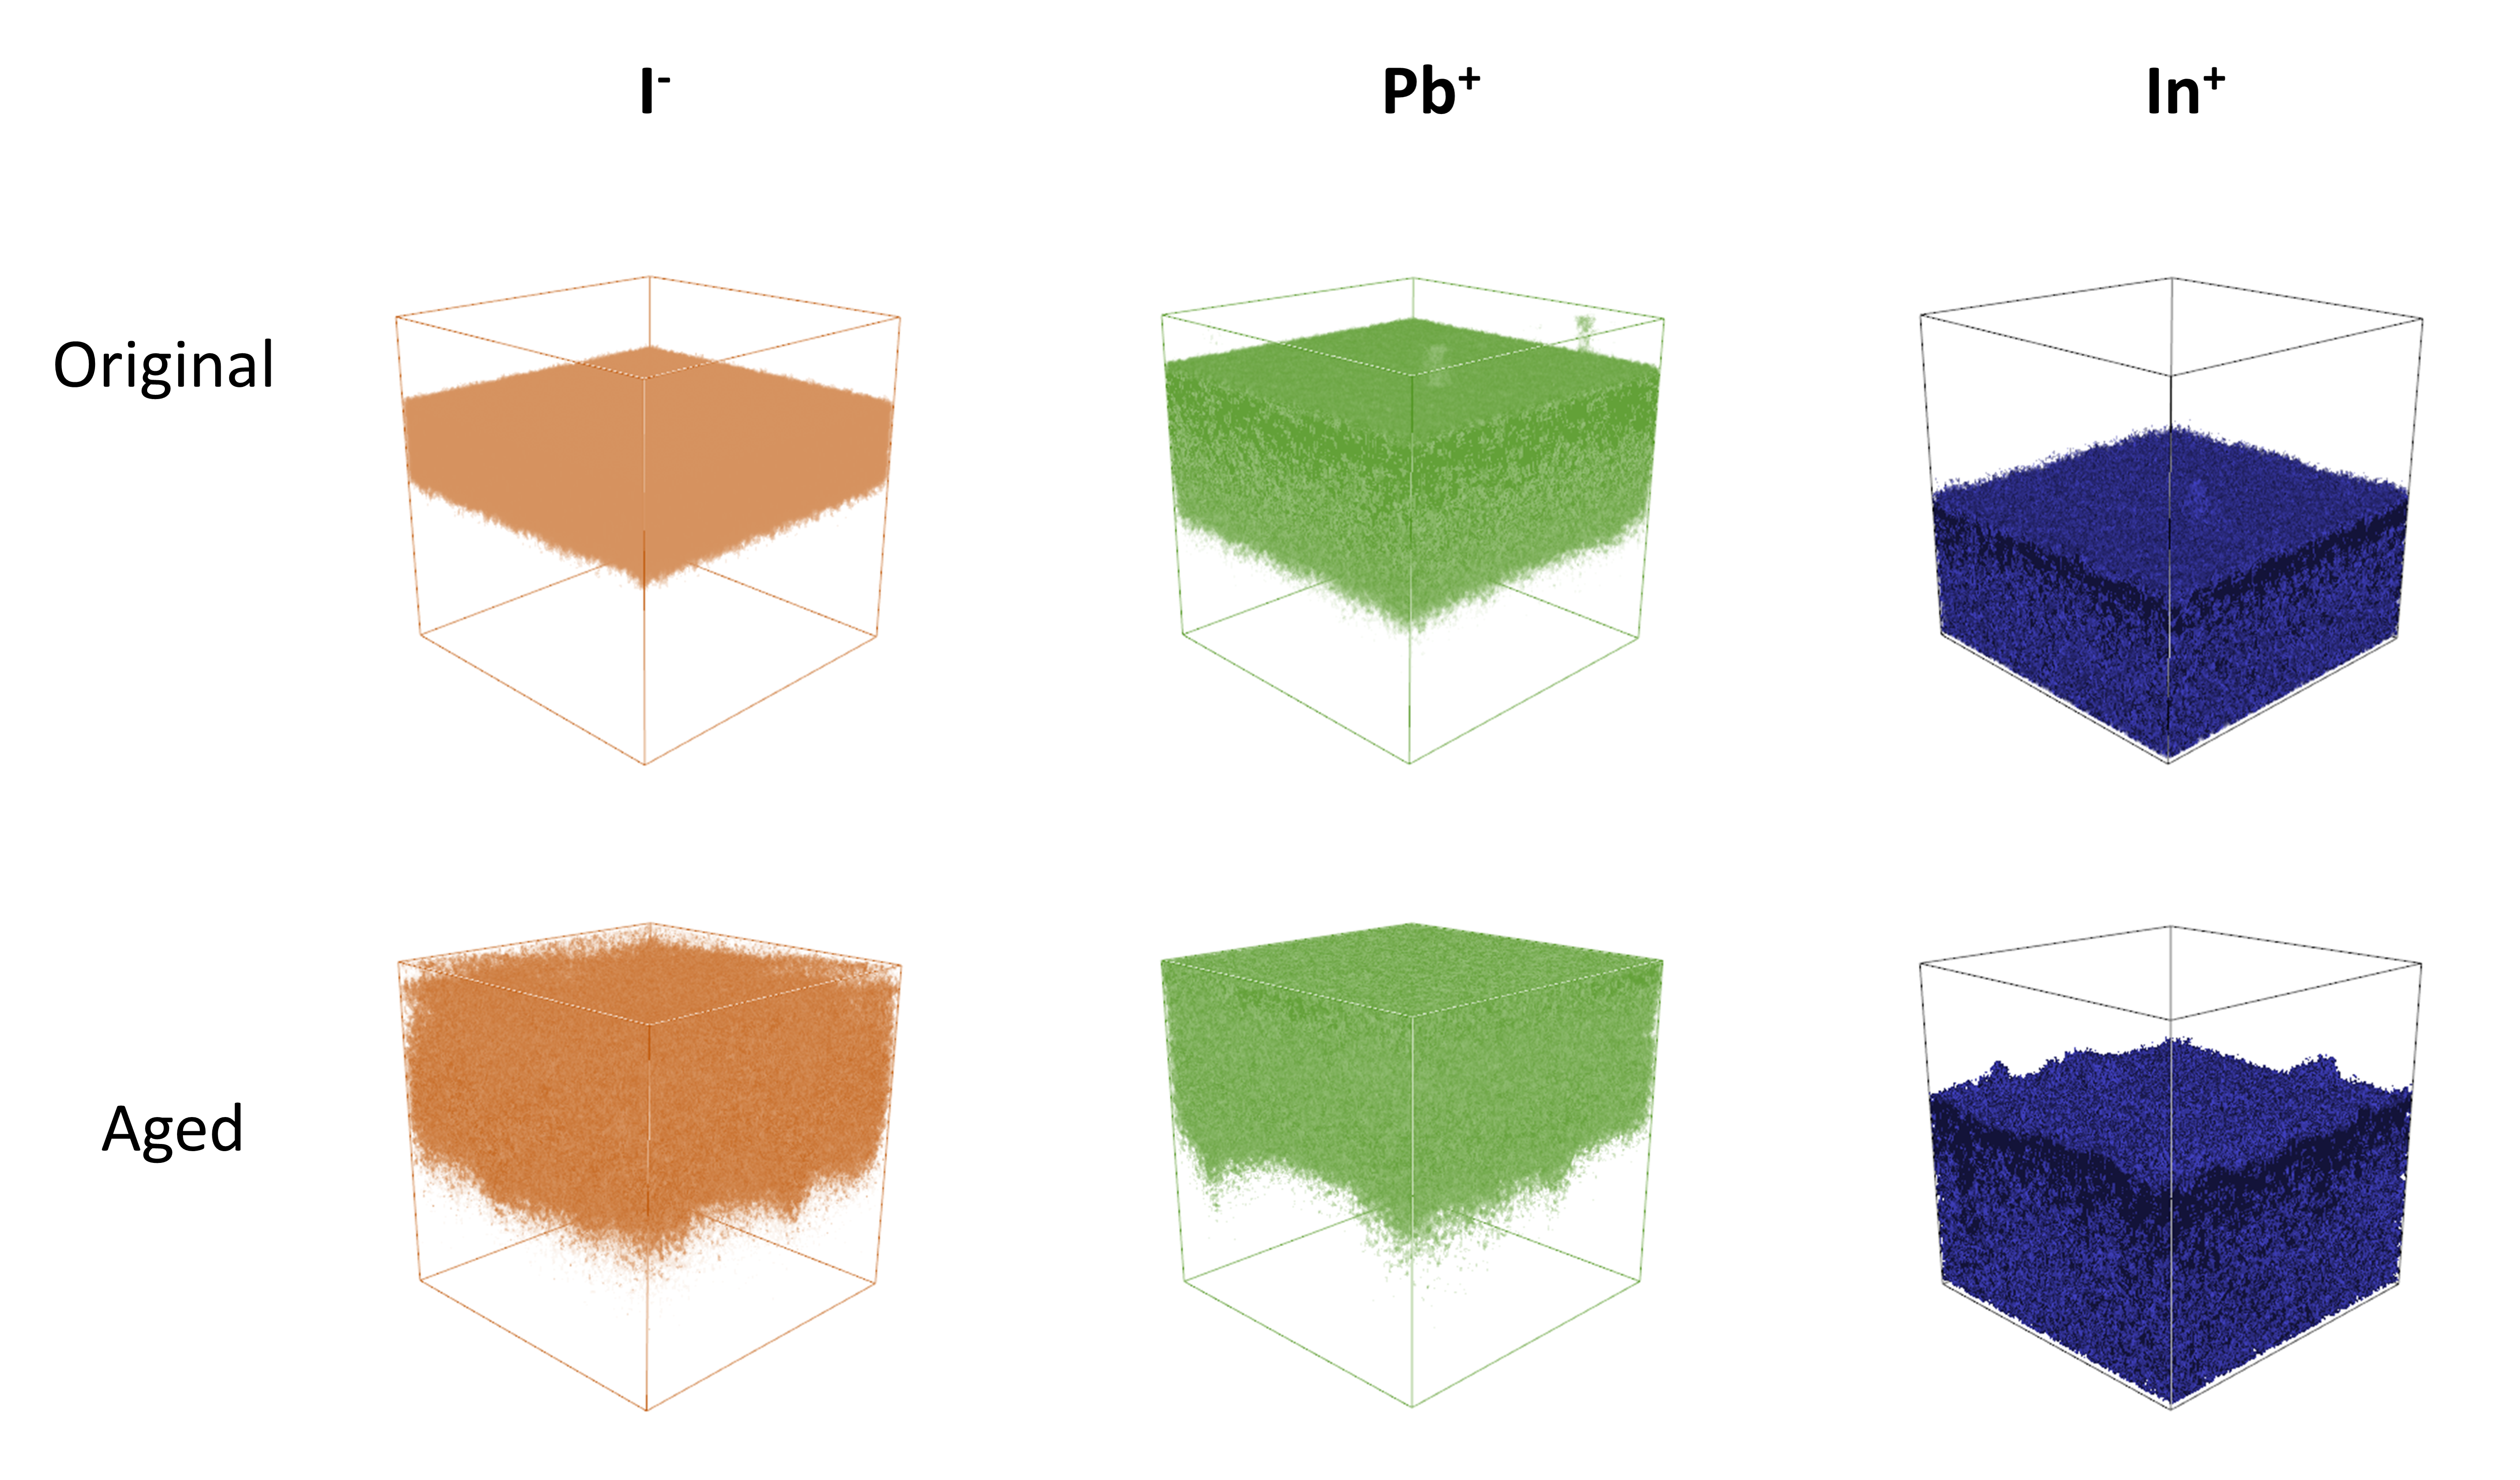


**Fig 9.** TOF-SIMS 3D distribution of I-,Pb+ and In+ inside the original and aged PSC at -5 V reverse bias for 2 hours.


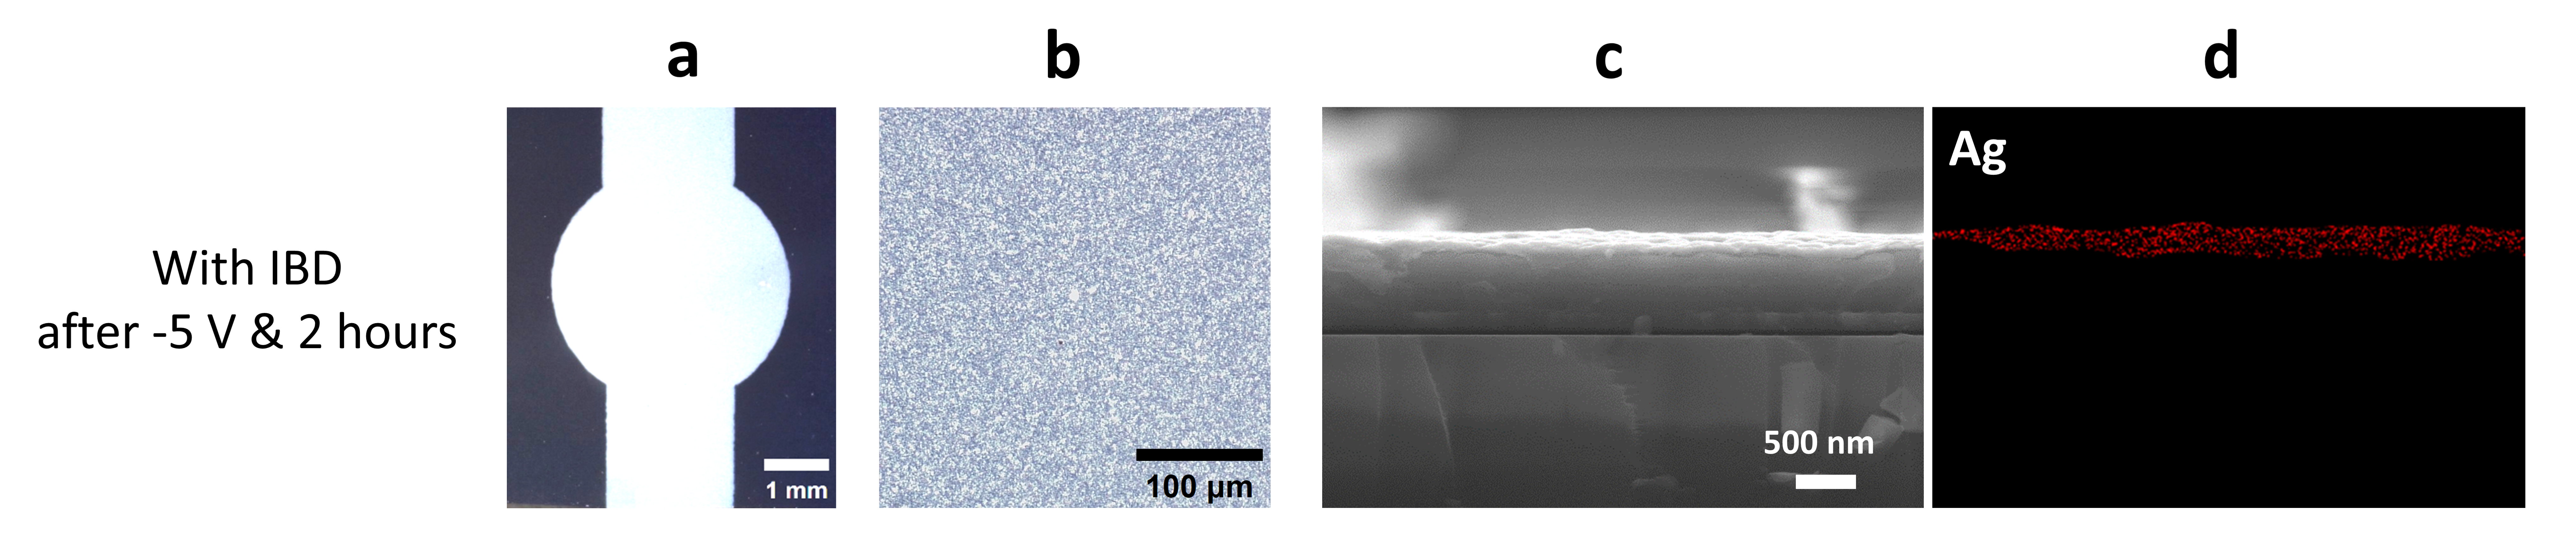


**Fig 10.** Microscope, cross-SEM and EDS mapping images of PSCs With IBD aged at -5 V for 2 h. a,b, Top view microscope images of Ag electrode at scales of 1 mm and 100 μm, respectively. c, Cross-SEM images of PSCs. d, EDS mapping of Ag atoms.


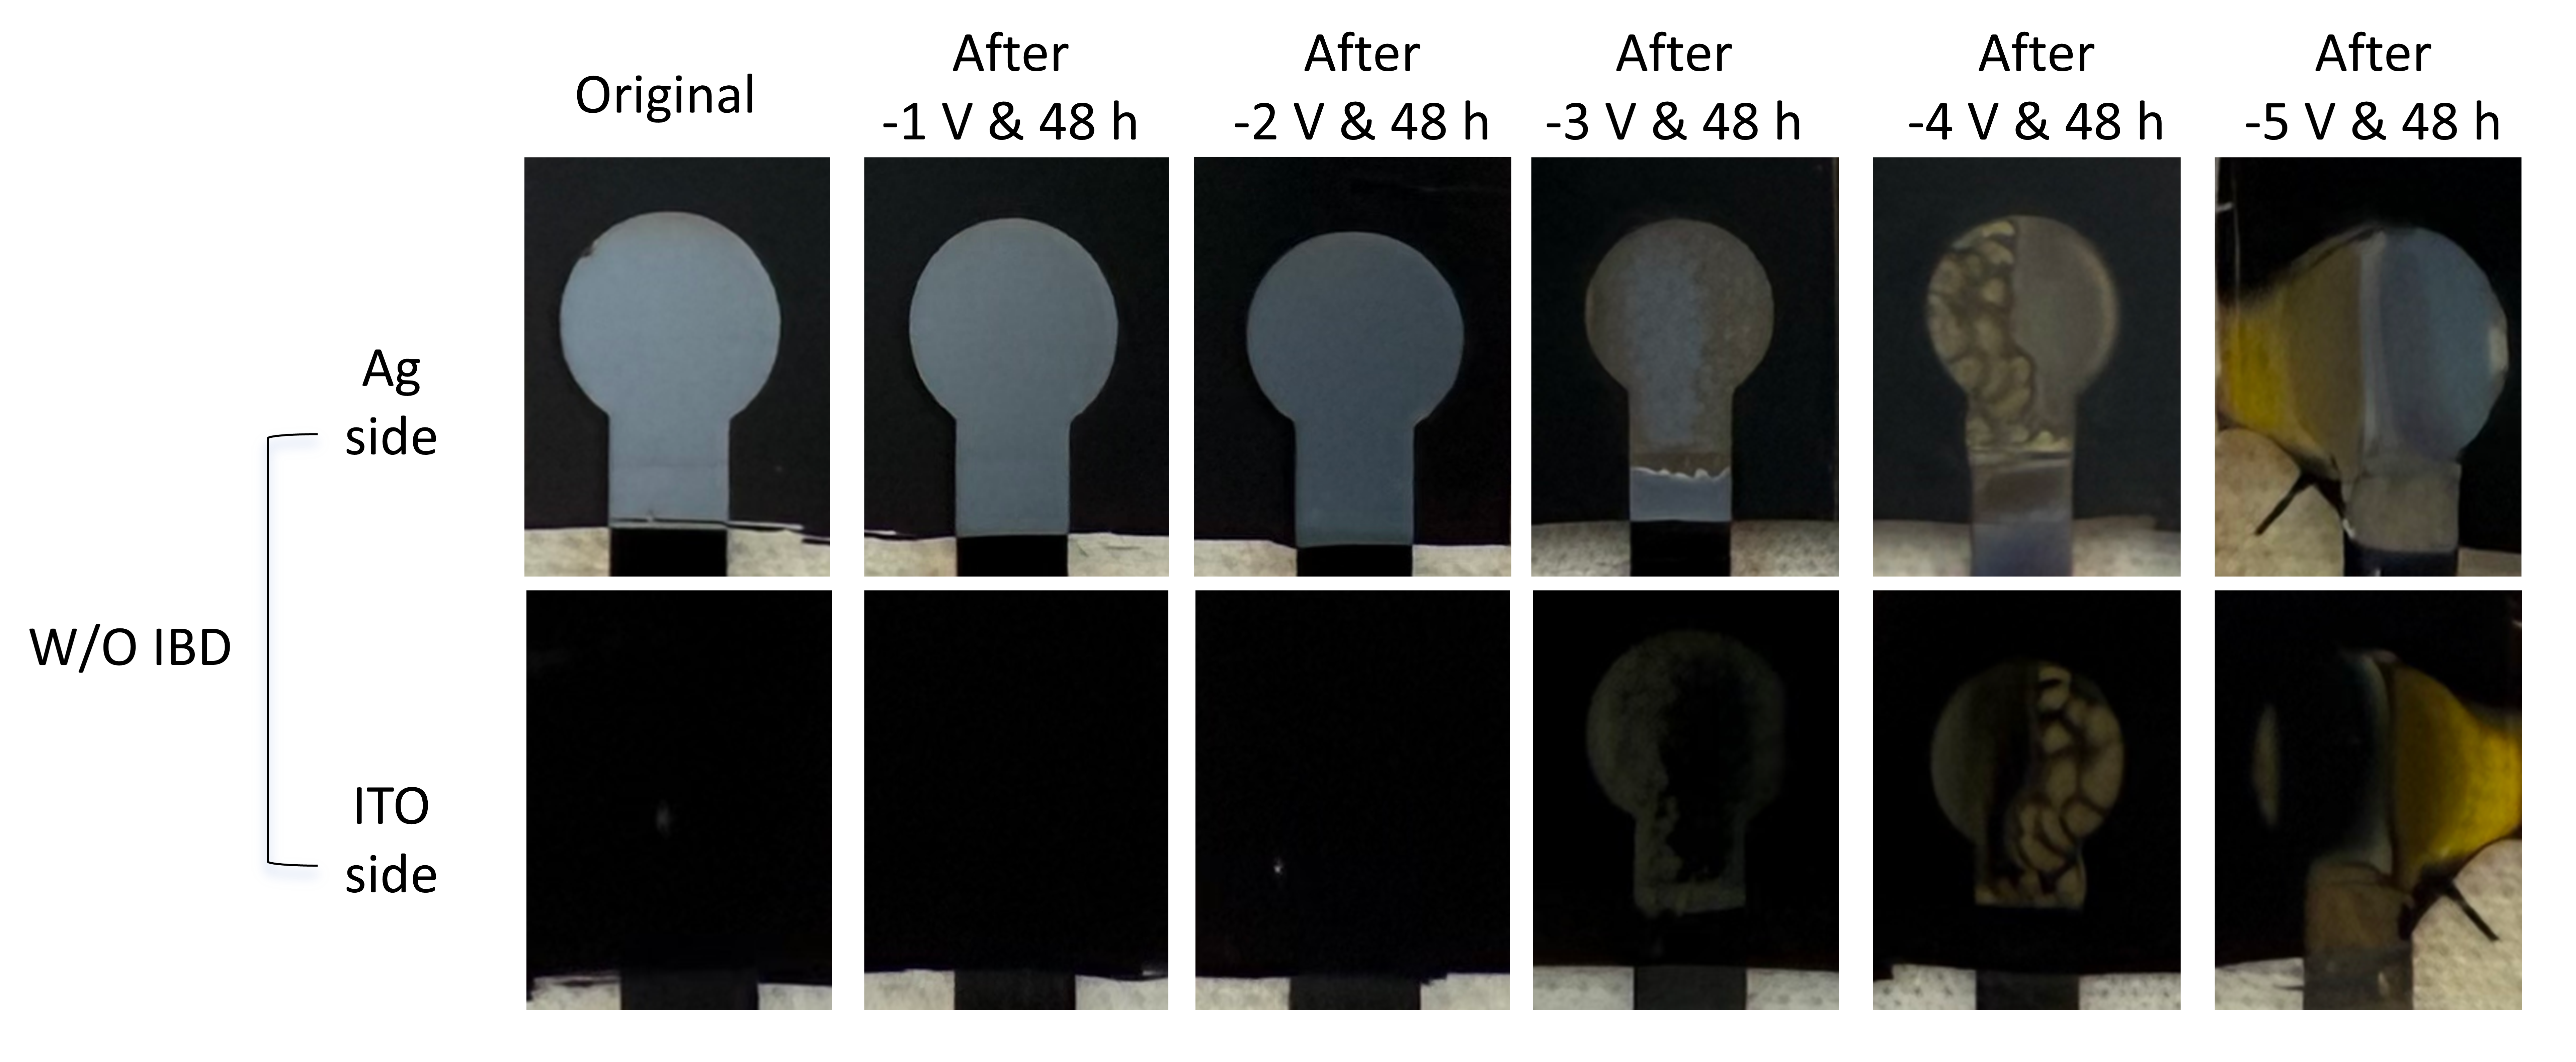


**Fig 11.** Photographs of PSCs W/O IBD before and after bias treatment for 48 h from Ag side(up) and ITO side(bottom), respectively.


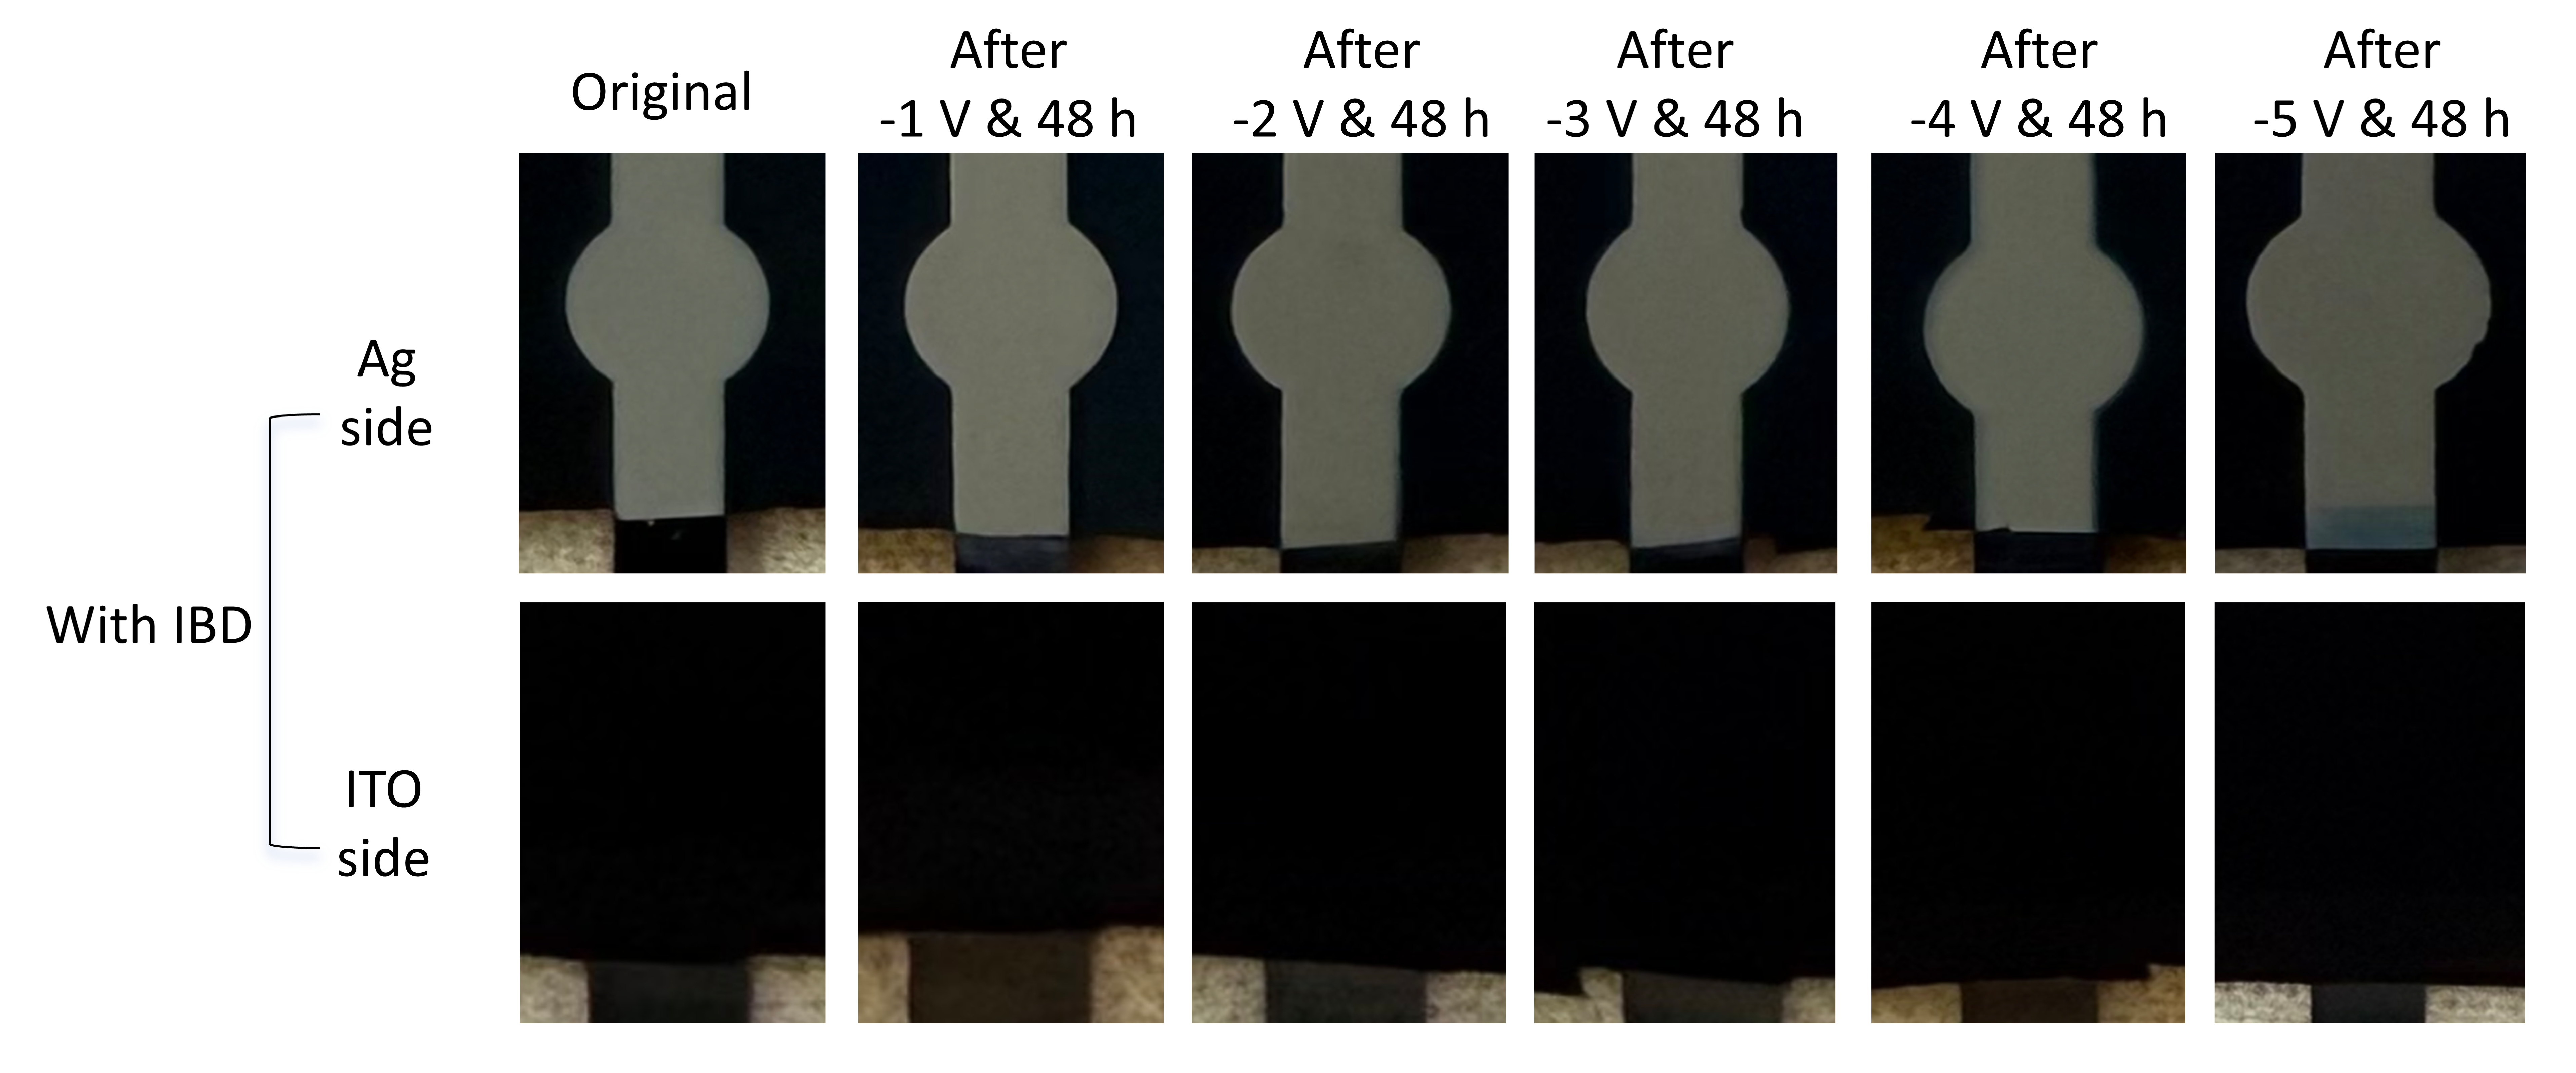


**Fig 12.** Photographs of PSCs With IBD before and after bias treatment for 48 h from Ag side(up) and ITO side(bottom), respectively.

**Supplementary Table**

**Supplementary Table S1.** Comprehensive comparison between integrated memristor (Memsol)13 and integrated bypass diode (IBD) for anti-reverse-bias PSCs.

| **Comparison Aspects** | **Integrated Bypass Diode (IBD, This Work)** | **Integrated Memristor (Memsol, Nature 2026)** |
| --- | --- | --- |
| **1. Structural Complexity** | Low to moderate. Adopts a lateral integrated structure combining standard diode and perovskite solar cell (PSC). The overall film stack is simplified, with only a limited number of extra functional layers introduced. The two functional regions (photoactive PSC and IBD) are clearly defined and electrically isolated via a simple transition zone. The device operates based on the unidirectional conduction characteristic of conventional diodes. | Relatively high. It integrates a memristor (non-linear resistive switch) on the basis of standard p-i-n PSC, forming a sophisticated multi-layer stack that contains photoresist (PL177), dual SiO dielectric layers and a reactive Ag bottom electrode. Additional transition and isolation structures are mandatory to prevent electrical short-circuit between the memristor and PSC active area, resulting in an intricate overall architecture. Its working mechanism relies on the resistive switching effect of memristor with electrical hysteresis. |
| **2. Working Mechanism** | Operates via unidirectional diode conduction; voltage is stably clamped at −1 V independent of current magnitude and illumination. | Relies on resistive switching with electrical hysteresis; switching performance is strongly current-dependent. |
| **3. Fabrication Complexity** | Moderate. The IBD is fabricated via a novel sequential deposition process that is fully compatible with conventional PSC manufacturing workflows. No complicated photolithography, bottom-side UV exposure or photoresist developing procedures are involved. The whole fabrication route contains fewer auxiliary steps, leading to low technical barriers and stable process repeatability. | High. The fabrication depends on multiple high-precision process steps, including selective material deposition, photoresist coating and patterning, bottom-side UV lithography, resist development, and multi-cycle thermal evaporation of dielectric layers. Strict control over film thickness and pattern alignment is required throughout the process, which greatly increases fabrication difficulty and brings notable yield risks for large-area devices. |

| **Comparison Aspects** | **Integrated Bypass Diode (IBD, This Work)** | **Integrated Memristor (Memsol, Nature 2026)** |
| --- | --- | --- |
| **4. Understanding & Analysis of PSC Reverse Bias Failure** | In-depth and systematic.  1. Systematically revealed the intrinsic correlation between variable illumination intensity, ion migration and reverse breakdown voltage (*VBD*); experimental data confirmed that residual light from partial shading reduces *VBD* by more than 20%.  2. Clarified Zener tunneling as the dominant reverse breakdown mechanism, and elaborated how light-induced elevation of ionic conductivity accelerates device degradation under reverse bias.  3. Multiple characterization techniques (XRD, TOF-SIMS, XPS) were applied to fully track material evolution, including perovskite decomposition, silver electrode migration and interfacial chemical changes under long-term reverse stress. | Limited and partial.  1. The work only describes macroscopic failure phenomena of PSCs under reverse bias, such as hotspot generation and efficiency attenuation, without exploring the essential relationship between illumination conditions, ionic behavior and the variation of *VBD*.  2. It lacks systematic investigation into the pathways of reverse breakdown, and fails to conduct quantitative analysis on material degradation and interfacial failure inside the device. No targeted characterization for electrode migration or perovskite decomposition is provided. |

| **Comparison Aspects** | **Integrated Bypass Diode (IBD, This Work)** | **Integrated Memristor (Memsol, Nature 2026)** |
| --- | --- | --- |
| **5. Severity of Reverse Bias Test Conditions** | Extremely harsh, simulating extreme practical operating scenarios.  1. Long-term continuous reverse bias test was carried out under a constant external reverse voltage of −5 V, which far exceeds the typical breakdown voltage of pristine PSCs.  2. Ultra-long stability evaluation lasted for 150 hours under persistent high reverse stress; 48-hour aging tests and repeated cycling tests were also included.  3. Tests were performed across a full gradient of illumination intensities, combined with cyclic reverse bias aging and short-term shading impact tests to replicate complex real-world working environments. | Moderate, with relatively mild stress levels.  1. All tests were implemented under a reverse voltage below −0.75 V, and the maximum limited reverse current was restricted to 40 mA.  2. Only short-period cyclic tests (up to 50 cycles) and medium-temperature thermal stability tests were conducted; no long-duration high reverse voltage endurance evaluation was performed.  3. Experiments were mainly conducted under fixed illumination, and the test conditions are close to low-stress partial shading scenarios. |

| **Comparison Aspects** | **Integrated Bypass Diode (IBD, This Work)** | **Integrated Memristor (Memsol, Nature 2026)** |
| --- | --- | --- |
| **6. Device Resistance to Reverse Bias** | Outstanding anti-reverse-bias capability with stable performance.  1. The IBD can stably clamp the device reverse voltage at approximately −1 V under all illumination levels, thoroughly eliminating the adverse impact of variable light on *VBD*.  2. After 150 hours of continuous −5 V reverse bias, the device still retains 87.6% of its initial PCE.  3. It exhibits excellent durability against repeated reverse bias cycling, maintaining over 95% of the original PCE after 100 cycles.  4. The integrated diode effectively suppresses silver diffusion, halide phase segregation and the formation of interfacial defects under reverse stress. | Good basic protection performance but with obvious inherent limitations.  1. The memristor turns on at around −0.1 V and clamps the voltage at ~ −0.05 V, while its switching behavior is strongly dependent on the magnitude of applied current.  2. A single memristor can only withstand a maximum reverse current of ~40 mA; parallel integration of multiple memristor units is required for high-current operation.  3. Incomplete reset of the memristor occasionally occurs during cycling tests, which causes temporary power loss of the device.  4. No long-term high reverse voltage stability data is available to verify its durability under extreme stress. |

| **Comparison Aspects** | **Integrated Bypass Diode (IBD, This Work)** | **Integrated Memristor (Memsol, Nature 2026)** |
| --- | --- | --- |
| **7. Significance for Large-Scale PSC Mass Production** | Highly promising for industrialization and module application.  1. The simple structure and fabrication process are highly compatible with existing commercial PSC and module production lines, requiring low production line retrofitting cost.  2. The overall power loss caused by IBD integration is controllable: the relative efficiency loss is about 8.3% for high-resistivity perovskite films, and drops to below 1% for low-resistivity perovskite materials.  3. The device maintains stable performance under diverse real-world shading and illumination conditions, perfectly adapting to outdoor module operation.  4. Superior long-term reliability effectively reduces the failure rate and after-sales maintenance risks of photovoltaic modules. Besides, module-level numerical simulations prove that IBD-equipped strings retain high power output under severe partial shading. | Restricted and challenging for large-scale manufacturing and practical deployment.  1. Complicated lithography and selective deposition processes push up production cost and reduce manufacturing yield, which is unfavorable for the fabrication of large-area perovskite modules.  2. The limited current tolerance of a single memristor requires parallel arrangement of multiple units for large-area cells, bringing technical challenges in synchronous switching and uniform heat distribution.  3. The occasional incomplete reset of memristor may lead to persistent potential power loss during long-term field operation.  4. The introduced photoresist and other organic layers may introduce extra hidden risks to the long-term outdoor stability of PSCs. Meanwhile, no module-level energy yield simulation is reported to verify its performance in large-size strings. |

**Notes:** The two strategies realize reverse bias protection by different working principles. This work adopts an integrated bypass diode (IBD) with simpler fabrication, superior long-term stability under high reverse voltage, and systematic mechanism exploration regarding illumination-dependent *VBD*. The integrated memristor requires sophisticated lithography processes and shows current-dependent switching behavior. The IBD proposed in this work not only achieves reliable reverse bias protection for perovskite solar cells, but also delivers an in-depth exploration of the fundamental failure mechanisms of PSCs under realistic partial shading. The relevant conclusions can provide universal guidance for the reliability optimization of perovskite photovoltaic technology.

Compared with the memristor-based Memsol device published in Nature (2026), the IBD solution achieves a superior comprehensive balance in multiple key dimensions, including fabrication feasibility, long-term anti-stress reliability, reverse bias endurance and production compatibility. Benefiting from simpler device architecture, mature manufacturing process, stronger tolerance to extreme reverse stress and stable performance under variable illumination, the IBD strategy possesses greater practical value and broader application prospects for the future commercialization and large-scale deployment of perovskite solar modules.

**References**

1 Henzel, J. *et al.* The impact of low-intensity illumination on the reverse bias behavior of perovskite solar cells. *Journal of Materials Chemistry A* **13**, 31755-31769 (2025). <https://doi.org/10.1039/D5TA04100G>

2 Bao, Y. *et al.* Reverse-Bias Breakdown Mechanisms and Mitigation Strategies in Perovskite Cells and Tandems. *Advanced Functional Materials* **n/a**, e24250 (2025). <https://doi.org/https://doi.org/10.1002/adfm.202524250>

3 Bowring, A. R., Bertoluzzi, L., O'Regan, B. C. & McGehee, M. D. Reverse Bias Behavior of Halide Perovskite Solar Cells. *Advanced Energy Materials* **8**, 1702365 (2018). <https://doi.org/https://doi.org/10.1002/aenm.201702365>

4 Aydin, E. *et al.* Ligand-bridged charge extraction and enhanced quantum efficiency enable efficient n–i–p perovskite/silicon tandem solar cells. *Energy & Environmental Science* **14**, 4377-4390 (2021).

5 Dussouillez, M. S. M. *Identification and Mitigation of Degradation Mechanisms Induced by Heat and Light in NiOx-based Perovskite Solar Cells*, EPFL, (2024).

6 Kuzyk, N. & Kutsiy, S. OPTIMIZATION OF THE PEROVSKITE SOLAR CELL STRUCTURE. *Information and communication technologies, electronic engineering* **4**, 163-171 (2024). <https://doi.org/10.23939/ictee2024.01.163>

7 Messmer, C. *et al.* Toward more reliable measurement procedures of perovskite‐silicon tandem solar cells: The role of transient device effects and measurement conditions. *Progress in Photovoltaics: Research and Applications* **33**, 126-142 (2025).

8 Patel, U. *et al.* SnO2 as Electron Transport Layer in CsPbBr3 Perovskite Solar Cells: Experimental and Simulation Approaches. *ACS Applied Energy Materials* **9**, 593-605 (2025).

9 Singh, P. K. & Dwivedi, D. K. *Perovskite Solar Cells: Sustainable Materials, Device Design, Renewable Energy Applications*. (Walter de Gruyter GmbH & Co KG, 2025).

10 Gao, Y. *et al.* Performance optimization of monolithic all-perovskite tandem solar cells under standard and real-world solar spectra. *Joule* **6**, 1944-1963 (2022).

11 Green, M. A. Solar cells: operating principles, technology, and system applications. (1981).

12 Lan, D. & Green, M. A. Combatting temperature and reverse-bias challenges facing perovskite solar cells. *Joule* **6**, 1782-1797 (2022). <https://doi.org/10.1016/j.joule.2022.06.014>

13 Mohammadi, M. *et al.* Integrated memristor for mitigating reverse-bias in perovskite solar cells. *Nature* **651**, 933-939 (2026). <https://doi.org/10.1038/s41586-026-10275-3>
